# Supplementary material for: Coordination engineering with crown ethers for perovskite precursor stabilization and defect passivation
Source: Royal Society of Chemistry journal article supplement (doi:10.1039/d4ee02124j), 2024-01-01
Supplement: d4ee02124j1.pdf [file d4ee02124j1.pdf]

## Supplemental Information

### **Coordination engineering with crown ethers for perovskite precursor stabilization and universal defect passivation**

Zhongyang Zhang <sup>a</sup>, Yuxuan Yang <sup>b</sup>, Zijian Huang <sup>c</sup>, Qiaoling Xu <sup>d,e</sup>, Siyuan Zhu <sup>d,f</sup>,  
Minghua Li <sup>g</sup>, Peng Zhao <sup>b</sup>, Hong Cui <sup>b</sup>, Sihan Li <sup>b</sup>, Xi Jin <sup>d</sup>, Xiaoxue Wu <sup>d</sup>, Mingyue  
Han <sup>d</sup>, Yu Zhang <sup>d</sup>, Ningjiu Zhao <sup>d</sup>, Chao Zou <sup>d</sup>, Qijie Liang <sup>d</sup>, Ledex Xian <sup>d,h</sup>, Jinsong  
Hu <sup>i</sup>, Cheng Zhu <sup>a</sup>, Yihua Chen <sup>a</sup>, Yang Bai <sup>a</sup>, Yujing Li <sup>a</sup>, Qi Chen <sup>a</sup>, Huanping Zhou <sup>c</sup>,  
Bao Zhang <sup>\*b</sup>, Yan Jiang <sup>\*a</sup>

<sup>a</sup> School of Materials Science and Engineering, Beijing Institute of Technology,  
Beijing 100081, China

E-mail: yan.jiang@bit.edu.cn (Yan Jiang).

<sup>b</sup> School of Chemical Engineering and Technology, Tianjin University, Tianjin 300350,  
China

E-mail: baozhang@tju.edu.cn (Bao Zhang)

<sup>c</sup> School of Materials Science and Engineering, Peking University, Beijing 100091,  
China

<sup>d</sup> Songshan Lake Materials Laboratory, Dongguan, Guangdong 523808, China

<sup>e</sup> College of Physics and Electronic Engineering, Center for Computational Sciences,  
Sichuan Normal University, Chengdu 610068, China

<sup>f</sup> Department of Physics, Liaoning University, Shenyang 110036, China

<sup>g</sup> College of Chemical Engineering, Beijing Advanced Innovation Center for Soft  
Matter Science and Engineering, Beijing University of Chemical Technology,  
Beijing 100029, China

<sup>h</sup> Max Planck Institute for the Structure and Dynamics of Matter, Center for Free  
Electron Laser Science, Hamburg, 22761, Germany

<sup>i</sup> Beijing National Laboratory for Molecular Sciences (BNLMS), Institute of  
Chemistry, Chinese Academy of Sciences, Beijing 100190, China

|    |                     |
|----|---------------------|
| 31 | This file includes: |
| 32 | Methods             |
| 33 | Figure S1 to 47     |
| 34 | Note S1 to 14       |
| 35 | Table S1 to 11      |
| 36 | References          |

## 37 **Methods**

### 38 **Materials:**

39 Pre-patterned ITO glass substrates were purchased from Advanced Election  
40 Technology Co., Ltd. Chlorobenzene (CB), N,N-dimethylformamide (DMF), dimethyl  
41 sulfoxide (DMSO), acetonitrile (ACN), isopropanol (IPA), cesium iodide (CsI), lead  
42 bromide (PbBr<sub>2</sub>), formamidinium acetate (FAAc), 4-tert-butylpyridine (tBP) and  
43 bis(trifluoromethane)sulfonimide lithium salt (Li-TFSI) were purchased from Sigma-  
44 Aldrich. Formamidinium iodide (FAI), methylammonium chloride (MACl),  
45 formamidinium bromide (FABr) and methylammonium bromide (MABr) were  
46 purchased from Greatcell Solar. Lead iodide (PbI<sub>2</sub>) was purchased from TCI. Lead  
47 chloride (PbCl<sub>2</sub>), Spiro-OMeTAD, PTAA, PC<sub>61</sub>BM, and 2-phenylethylamine  
48 hydroiodide (PEAI) were purchased from Xi'an Polymer Light Technology. Tin (IV)  
49 oxide (SnO<sub>2</sub>) colloidal solution (15% in H<sub>2</sub>O) was purchased from Alfa Aesar. 18-  
50 crown-6 (18C6), 15-crown-5 (15C5), 1-aza-18-crown-6-ether (A18C6), 4,13-diaza-18-  
51 crown-6-ether (DA18C6), 1-aza-15-crown-5-ether (A15C5), 1,7-diaza-15-crown 5-  
52 ether (DA15C5), hydroiodic acid (HI, 55-57 wt.% in H<sub>2</sub>O, with 1.5% hypophosphorous  
53 acid), 2-hydroxy-4-methoxy-5-sulfonate-benzophenone (SBP) and  $\gamma$ -butyrolactone  
54 (GBL) were purchased from Aladdin.

55

### 56 **Synthesis of FAPbI<sub>3</sub> and MAPbBr<sub>3</sub> single crystals:**

57 Firstly, formamidinium iodide (FAI) was synthesized by reacting 6 mL of  
58 hydroiodic acid (55-57 wt.% in water) with 3.9 g of formamidinium acetate (FAAc) in  
59 an ice bath for 2 hours. The light yellow mixture was evaporated at 100 °C for 1 h to  
60 remove HAc and remaining HI, and the white precipitate was recovered. The crude  
61 product was recrystallized in hot anhydrous ethanol and the white platelike crystal was  
62 obtained. Then the white crystal was washed with diethyl ether and dried.

63 Single crystal FAPbI<sub>3</sub> was synthesized referring to the method described  
64 elsewhere<sup>1</sup>. 2.2 g of synthesized FAI, 6.0 g of PbI<sub>2</sub> and 10 mL of GBL were mixed in a  
65 closed glass bottle (volume with 20 mL capacity). The yellow solution was filtered by

66 0.45  $\mu\text{m}$  nylon filters and heated on a hot plate (60  $^{\circ}\text{C}$  for 1 h, 110  $^{\circ}\text{C}$  for 1 h, 130  $^{\circ}\text{C}$   
67 for 1 h and 150  $^{\circ}\text{C}$  for 2 h). The shiny black single crystals ( $\alpha\text{-FAPbI}_3$ ) were grown in  
68 GBL solution, dried on a hot plate at 110  $^{\circ}\text{C}$  for 2 h in a nitrogen glove box and stored  
69 in transparent glass bottles (the yield of  $\text{FAPbI}_3$  was  $\sim 30\%$ )<sup>[53]</sup>. The phase purity of  
70  $\text{FAPbI}_3$  was verified by XRD.

71 Single crystal  $\text{MAPbBr}_3$  was synthesized referring to the literature<sup>2</sup>. 2.4 g of  $\text{MABr}$ ,  
72 7.7 g of  $\text{PbBr}_2$ , and 15 mL of  $\text{DMF}$  were mixed in a closed glass bottle and stirred  
73 overnight at room temperature (20  $^{\circ}\text{C}$ ). After complete dissolution, the colorless  
74 solution was filtered by 0.45  $\mu\text{m}$  filters, moved to a 30 mL glass bottle, and heated on  
75 a hot plate (40  $^{\circ}\text{C}$  for 1 h, 70  $^{\circ}\text{C}$  for 1 h, 100  $^{\circ}\text{C}$  for 1 h, 110  $^{\circ}\text{C}$  for 1 h and 120  $^{\circ}\text{C}$  for  
76 1 h). The bright orange nanocubes ( $\text{MAPbBr}_3$ ) were grown in  $\text{DMF}$  solution, dried on  
77 a hot plate at 80  $^{\circ}\text{C}$  for 2 h in a nitrogen glove box and collected in transparent glass  
78 bottles (the yield of  $\text{MAPbBr}_3$  was  $\sim 50\%$ ). The phase purity of  $\text{MAPbBr}_3$  was verified  
79 by XRD.

80

### 81 **Precursor Preparation:**

82 Perovskite precursor solutions were prepared in a nitrogen glove box. For 1.56 eV  
83  $[\text{Cs}_{0.04}(\text{FA}_{0.97}\text{MA}_{0.03})_{0.96}\text{Pb}(\text{I}_{0.97}\text{Br}_{0.03})_3]$  perovskite<sup>[25]</sup>, undoped perovskite precursor  
84 solution was prepared by dissolving 0.068 mol/L  $\text{CsI}$ , 0.044 mol/L  $\text{MABr}$ , 0.444 mol/L  
85  $\text{MACl}$ , 0.044 mol/L  $\text{PbBr}_2$ , 1.465 mol/L  $\text{FAI}$  and 1.594 mol/L  $\text{PbI}_2$  in a mixed  
86 anhydrous solvent ( $\text{DMF:DMSO}=4:1$ ). For 1.52 eV  $[(\text{FAPbI}_3)_{0.95}(\text{MAPbBr}_3)_{0.05}]$   
87 perovskite<sup>3</sup>, undoped perovskite precursor solution was prepared by dissolving 0.069  
88 mol/L  $\text{MABr}$ , 0.069 mol/L  $\text{PbBr}_2$ , 0.489 mol/L  $\text{MACl}$ , 1.40 mol/L  $\text{FAI}$  and 1.40 mol/L  
89  $\text{PbI}_2$  in a mixed anhydrous solvent ( $\text{DMF:DMSO}=4:1$ ). For 1.67 eV  
90  $[\text{Cs}_{0.22}\text{FA}_{0.78}\text{Pb}(\text{I}_{0.85}\text{Br}_{0.15})_3-0.03\text{MAPbCl}_3]$  wide bandgap perovskite<sup>4</sup>, undoped  
91 perovskite precursor solution was prepared by dissolving 0.045 mol/L  $\text{MACl}$ , 0.045  
92 mol/L  $\text{PbCl}_2$ , 0.33 mol/L  $\text{CsI}$ , 0.225 mol/L  $\text{FABr}$ , 0.225 mol/L  $\text{PbBr}_2$ , 0.945 mol/L  $\text{FAI}$   
93 and 1.29 mol/L  $\text{PbI}_2$  in a mixed anhydrous solvent ( $\text{DMF:DMSO}=4:1$ ).

94 The ACE stock solutions (4 mmol/L) were prepared in a mixed solvent  
95 ( $\text{DMF:DMSO}=4:1$ ). For the ACE-doped perovskite precursor solution, the

96 corresponding amount of the ACE solution was added to the undoped perovskite  
97 precursor solution, followed by stirring at 60 °C for 1 hour and cooling down before  
98 use. The PEAI solution (20 mmol/L) was obtained by dissolving PEAI powder in IPA.  
99 Lastly, 72.3 mg of spiro-OMeTAD, 28.5 μL of tBP and 17.5 μL of Li-TFSI (520 mg/mL  
100 in acetonitrile) were mixed in 1 mL CB. All of the solutions were filtered by 0.22 μm  
101 filters before use.

102

### 103 **Device fabrication:**

104 Pre-patterned ITO glass substrates were cleaned with anhydrous alcohol and  
105 acetone using an ultrasonic cleaner. To prepare SnO<sub>2</sub> thin film, 100 μL SnO<sub>2</sub> colloidal  
106 solution was spin-coated onto the cleaned ITO substrate at 4000 rpm for 30 s, followed  
107 by drying at 150 °C for 30 min in air. Perovskite precursor solutions were spin-coated  
108 onto the SnO<sub>2</sub> layer at 6000 rpm for 30 s in a dry air glove box (RH<5%). During the  
109 spin-coating process, ~200 μL chlorobenzene was rapidly dropped onto the substrates  
110 at 22 s. The films were heated at 100 °C for 30 min in a dry air glove box, and then the  
111 samples were transferred to a nitrogen glove box. For 1.56 eV perovskite, 50 μL PEAI  
112 solution was spin-coated onto perovskite films at 5000 rpm for 30 s without additional  
113 thermal annealing. The spiro-OMeTAD solution was deposited on the as-prepared  
114 perovskite substrates at 3000 rpm for 30 s. Finally, 50 nm Au electrode was thermally  
115 evaporated under a high vacuum condition ( $<10^{-5}$  Pa).

116 For high-efficiency 1.56 eV PSCs, in order to enhance phase purity of cubic α-  
117 FAPbI<sub>3</sub> and reduce defects<sup>5</sup>, the conventional precursor mixture (FAI, PbI<sub>2</sub>, MABr and  
118 PbBr<sub>2</sub>) was replaced with our home-made presynthesized single crystals. Specifically,  
119 0.068 mol/L CsI, 0.13 mol/L PbI<sub>2</sub>, 0.444 mol/L MAcl, 0.044 mol/L MAPbBr<sub>3</sub> and  
120 1.465 mol/L FAPbI<sub>3</sub> were dissolved in a mixed anhydrous solvent (DMF:DMSO=4:1)  
121 for preparing perovskite solution. Then the corresponding amount of the A18C6 was  
122 added according to the method above. Other fabrication processes were not changed.

123 For the operational stability tests, the devices with a structure of  
124 ITO/SnO<sub>2</sub>/PVK/PEAI/HTL/MoO<sub>3</sub>/Au were fabricated. For preparing SnO<sub>2</sub> layer, 2-  
125 hydroxy-4-methoxy-5-sulfonate-benzophenone was added into SnO<sub>2</sub> solution (0.5

126 mg/mL) to passivate interface defects. The SnO<sub>2</sub> solution was filtered by 0.45 μm filters  
127 before use, and 150 μL solution was spin-coated onto the ITO substrate at 4000 rpm for  
128 30 s, followed by drying at 90 °C for 5 min and 150 °C for 30 min. For preparing  
129 [Cs<sub>0.04</sub>(FA<sub>0.97</sub>MA<sub>0.03</sub>)<sub>0.96</sub>Pb(I<sub>0.97</sub>Br<sub>0.03</sub>)<sub>3</sub>] perovskite solution, presynthesized FAPbI<sub>3</sub> and  
130 MAPbBr<sub>3</sub> single crystals were used to replace FAI, PbI<sub>2</sub>, MABr and PbBr<sub>2</sub> as discussed  
131 above. 75 μL PEAI solution (20 mmol/L) was spin-coated onto perovskite films at 5000  
132 rpm for 30 s, followed by drying at 100 °C for 5 min. PTAA/spiro-OMeTAD was used  
133 as hole transport layer<sup>50</sup>. The PTAA solution (10 mg/mL PTAA in CB, containing 10  
134 μL of tBP and 5 μL of Li-TFSI) and the spiro-OMeTAD solution (72.3 mg/mL spiro-  
135 OMeTAD in CB, containing 28.5 μL of tBP and 17.5 μL of Li-TFSI) were mixed in  
136 equal volumes. Then 50 μL mixed solution was deposited onto the PEAI-coated  
137 perovskite layer at 3000 rpm for 30 s. 10 nm MoO<sub>3</sub> and 200 nm Au were thermally  
138 evaporated under a high vacuum condition.

139

#### 140 **Characterization:**

141 Liquid-state <sup>1</sup>H NMR spectra were measured by using the Varian Inova 400. UV-  
142 vis absorption spectra were measured by using HITACHI UH4150. The DLS colloid  
143 size distributions were obtained by Malvern Zetasizer Nano Series spectrophotometer.  
144 XPS characterizations were performed by using Thermo Fisher ESCALAB Xi+ (Al Kα  
145 source). XRD patterns were measured by using a Bruker D8 Advance X-ray  
146 diffractometer (Cu Kα radiation). The Grazing incidence wide-angle X-ray scattering  
147 (GIWAXS) data were obtained at beamline BL14B1 of the Shanghai Synchrotron  
148 Radiation Facility (SSRF) using X-ray with a wavelength of 1.243 Å. FE-SEM images  
149 were obtained by using the Zeiss Gemini SEM 300. AFM topography were obtained by  
150 Asylum Research Cypher S (Oxford). PL mapping was obtained by Confocal  
151 Microscopy (SPCM-1000) supported by Enli Technology Co., Ltd. Steady-state PL  
152 spectra were tested by using HITACHI F-7100 and excited by a 470-nm light source of  
153 a Xe lamp with a 550-nm filter. Time-resolved photoluminescence spectra were  
154 recorded by Light Conversion Harpia with an excitation of 470 nm. For light intensity-  
155 dependent open-circuit voltage measurements, neutral density filters (Thorlabs) were

156 used for reducing light intensity. Mott-Schottky plots were obtained by an  
157 electrochemical workstation (CHI 660E). For the space-charge-limited-current (SCLC)  
158 test, the trap-state densities of devices were evaluated by dark  $J$ - $V$  characteristics of a  
159 hole-only device (ITO/PTAA/PVK/spiro-OMeTAD/Au) and an electron-only device  
160 (ITO/SnO<sub>2</sub>/PVK/PC<sub>61</sub>BM/Au). The  $J$ - $V$  characteristics of photovoltaic devices were  
161 measured with a solar simulator (Newport) and Keithley 2400 source meter under AM  
162 1.5 G standard irradiation (1000 W/m<sup>2</sup>) in an ambient air atmosphere (25 °C, RH 30%).  
163 Intensity of the solar simulator was calibrated using a certified monocrystalline silicon  
164 solar cell (KG5). The active area of device is 0.08313 cm<sup>2</sup>, defined by a metal mask.  
165 Both reverse scans (1.2 → 0 V, step: 0.02 V, delay time: 20 ms) and forward scans (0  
166 → 1.2 V, step: 0.02 V, delay time: 20 ms) were conducted. External quantum efficiency  
167 (EQE) is recorded on a solar cell quantum efficiency measurement system (QE-R)  
168 supported by Enli Technology. A calibrated Si diode with a known spectral response is  
169 used as a reference. For the operational tests, the unencapsulated devices with the  
170 structure of ITO/SnO<sub>2</sub>/PVK/PEAI/HTL/MoO<sub>3</sub>/Au were tested under 100 mW/cm<sup>2</sup> at  
171 25 °C in nitrogen, and the PSCs were aged under a large area white LED lamp and at  
172 their maximum power points (MPP).

173

#### 174 **DFT calculation:**

175 The highest occupied molecular orbital (HOMO) and lowest unoccupied  
176 molecular orbital (LUMO) energy levels of molecules were calculated using the  
177 Gaussian 09 package. At the same calculation level, the ground state structure  
178 optimization and vibration analysis were carried out based on the B3LYP functional  
179 and the def2TZVP basis set, respectively, to ensure that the molecule is located at the  
180 lowest point of potential energy. In the Multiwfn program<sup>6</sup>, the positions and  
181 distributions of the HOMO and LUMO energy levels were obtained. The electrostatic  
182 potential map was evaluated with the code Multiwfn, which was based on the highly  
183 effective algorithm.

184 The Vienna Ab initio simulation package (VASP) was used to determine the ground  
185 state of the system<sup>7</sup>. The electron-ion interaction was described by using projector

186 augmented-wave (PAW) pseudopotentials. The exchange-correlation functionals were  
187 treated at the general gradient approximation (GGA) level with the method of Perdew,  
188 Burke, and Ernzerhof (PBE)<sup>8</sup>. The FAPbI<sub>3</sub> (001) PbI<sub>2</sub>-terminated surface slab model  
189 was built based on the cubic-phased  $2\sqrt{2} \times 2\sqrt{2}$  supercells containing 7 atomic layers.  
190 DFT was most conveniently set up using periodic boundary condition and therefore, an  
191 auxiliary vacuum region at least 25 Å along the z-direction was added. This region was  
192 chosen to be large enough such that artificial interactions between periodic slabs could  
193 be neglected. An energy cutoff of 500 eV for the plane wave expansion and a k-point  
194 mesh of  $1 \times 1 \times 1$  were used for all subsequent calculations. The convergence of total  
195 energy reached the level of less than  $1.0 \times 10^{-5}$  eV, and the residual forces on the relaxed  
196 atoms became smaller than 0.05 eV/Å. Long-range dispersion interactions, which  
197 played an important role on organic cation orientation and structural optimization<sup>9</sup>,  
198 were considered in this work. The van der Waals correction proposed by the Grimme  
199 potential (D3-BJ) was employed for all subsequent calculations<sup>10</sup>. The bottom 4 layers  
200 of atoms were fixed and all other atoms were fully relaxed during structural  
201 optimization. To ensure computational efficiency in the simulation, LREAL = A has  
202 been adopted, and parallel computing parameters such as NSIM have been set  
203 appropriately. In the ionic relaxation of the slab model, ISIF = 2 has been employed.  
204 The charge density difference distribution was defined as  $\Delta\rho = \rho(\text{total}) - \rho(\text{PVK slab})$   
205  $- \rho(\text{molecule})$ , where  $\rho(\text{total})$  was the total charge density of the slab after the  
206 perovskite-molecule interactions,  $\rho(\text{PVK})$  and  $\rho(\text{molecule})$  were the charge densities  
207 of the isolated perovskite slab and the molecule, respectively. Structure visualization  
208 and 3D charge density difference plotting were performed by the VESTA. VASPKIT  
209 was used for plotting the planar average charge density difference<sup>11</sup>.



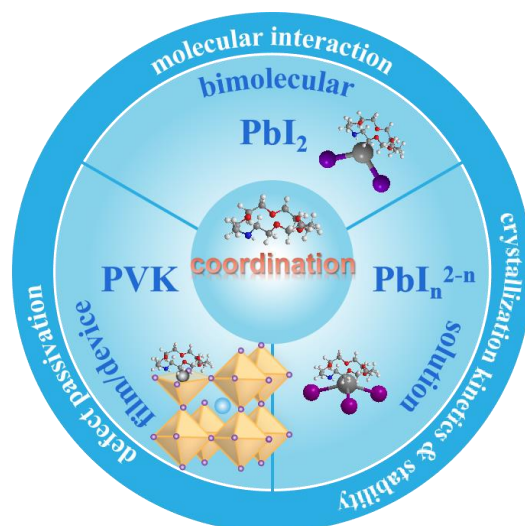

210

211 **Figure S1.** Schematic diagram of the coordination ability of crown ethers and the  
 212 interactions with  $\text{PbI}_2$ , iodoplumbates solution and perovskite film.

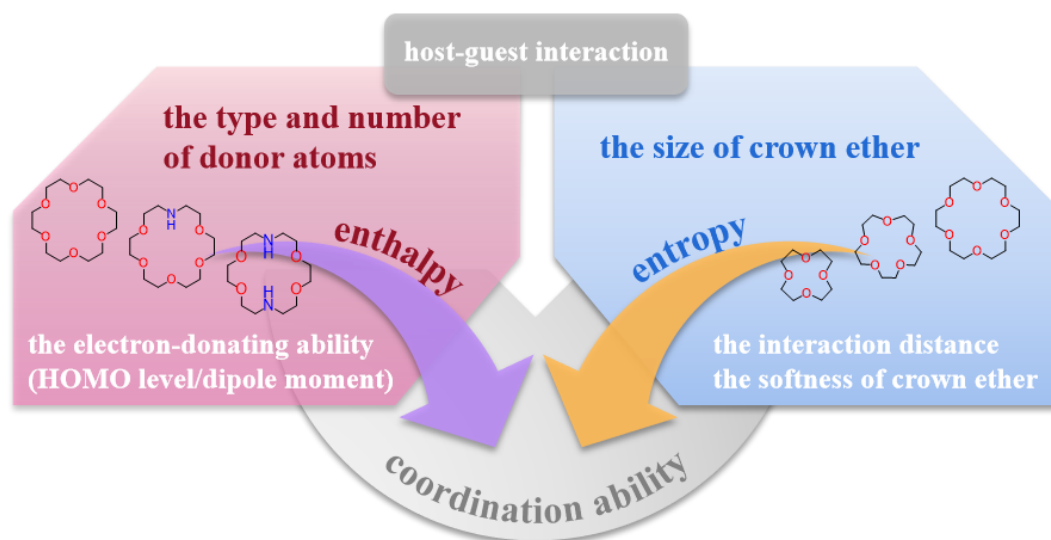

213

214 **Figure S2.** Schematic diagram of influencing factors for coordination ability based on  
 215 host-guest interaction.

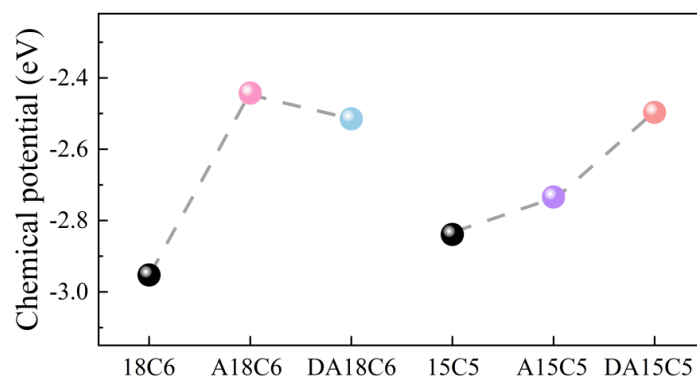

216

217 **Figure S3.** The energy values of chemical potential ( $\mu$ ) of crown ethers.

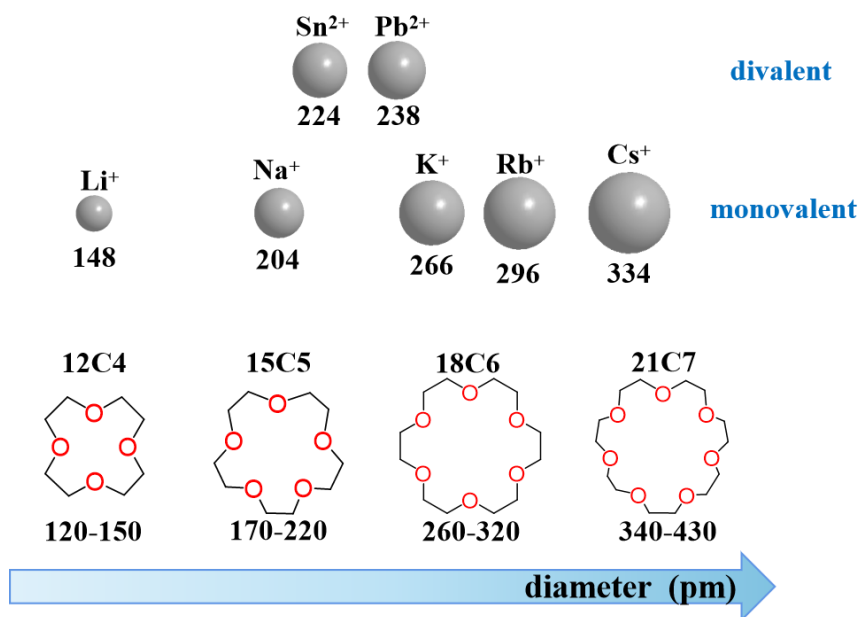

218

219

**Figure S4.** Schematic diagram of diameters of cations and cavity sizes of crown ethers.

220

12C4, 15C5, 18C6 and 21C7 are abbreviations for 12-crown-4 (12C4), 15-crown-5

221

(15C5), 18-crown-6 (18C6) and 21-crown-7 (21C7)<sup>12,13</sup>.

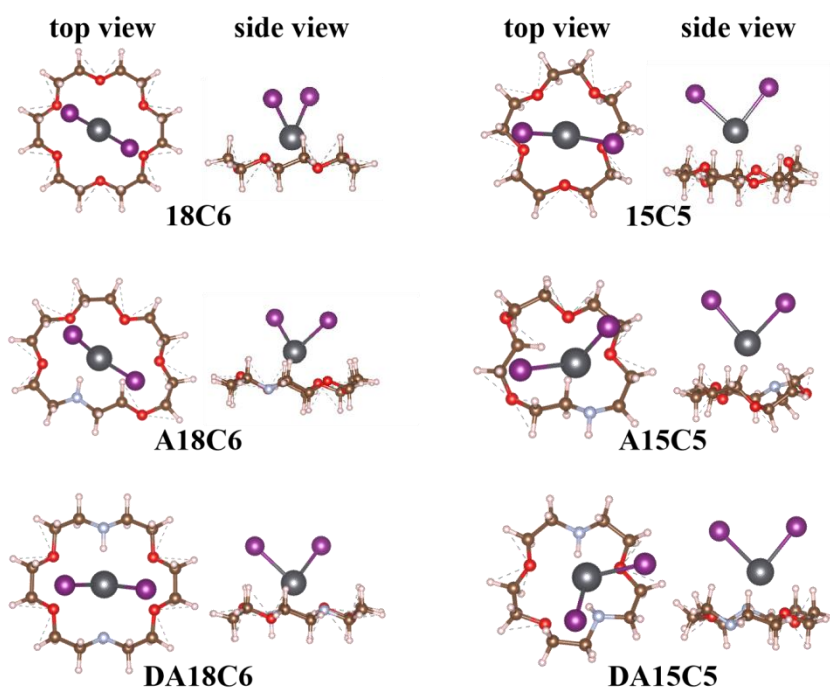

222

223 **Figure S5.** Top and side views of the atomic structure of crown ethers interacting with  
 224  $\text{PbI}_2$  used in the DFT calculation. The brown, white, red, ice-blue, gray and purple  
 225 colors indicate C, H, O, N, Pb and I atoms respectively.

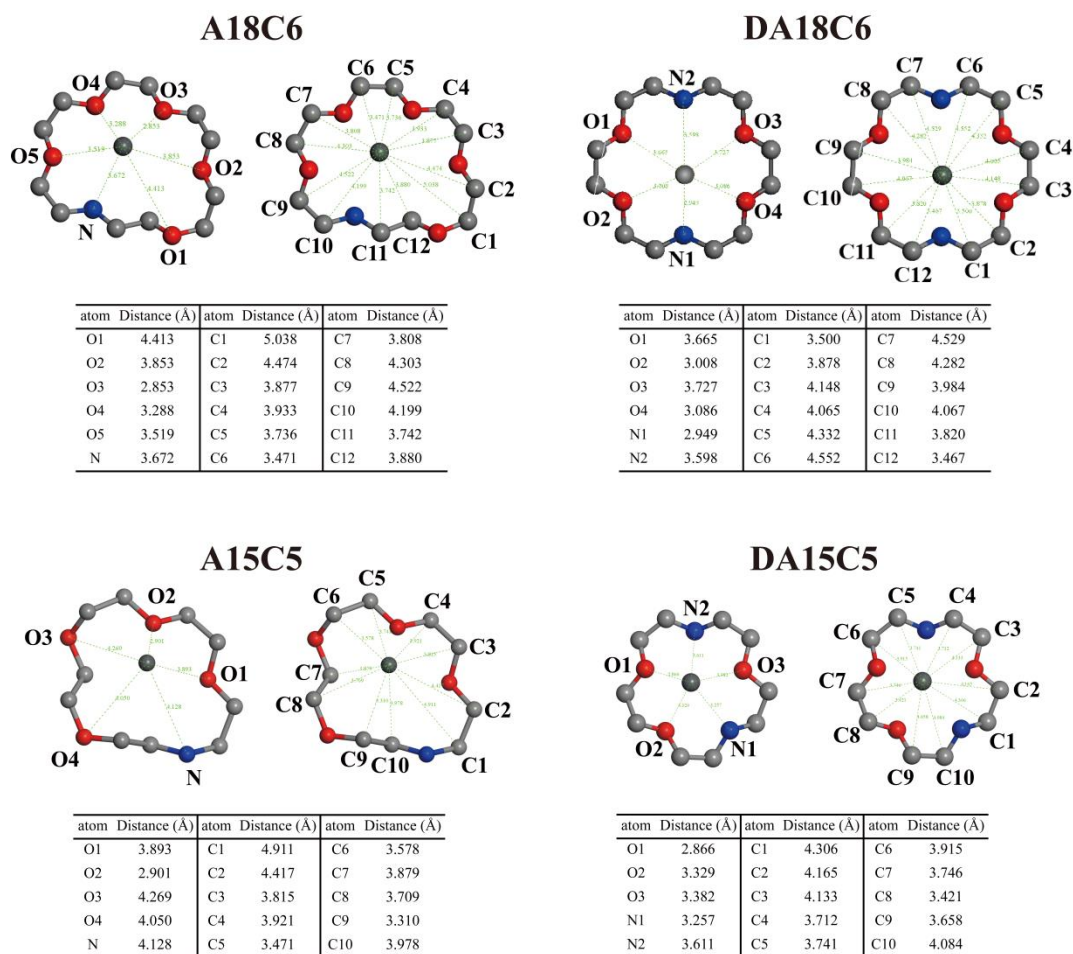

226

227 **Figure S6.** The distances between carbon, oxygen and nitrogen atoms and lead atom in  
 228 DFT analysis. Atoms are numbered outside the ring. Hydrogen and iodide atoms are  
 229 hidden for easy observation. The gray, red, blue and black colors indicate C, O, N and  
 230 Pb atoms respectively.

231 **Note S1. Calculation of distances between CEs and  $Pb^{2+}$**

232 In order to distinguish the interaction distance between  $Pb^{2+}$  and CEs, firstly we  
233 show the distances between carbon, oxygen and nitrogen atoms and lead atom in **Figure**  
234 **S6**. Then we calculate the average distances in **Table S3**. Interestingly, [Pb-all]  
235 distances of 15-membered crown ethers (i.e., A15C5 and DA15C5) are closer than  
236 those of 18-membered crown ethers (i.e., A18C6 and DA18C6), which mainly results  
237 from smaller cavity sizes of 15-membered crown ethers, instead of stronger interaction  
238 with  $Pb^{2+}$ .

239 Furthermore, we consider that the vertical distance between Pb and CE plane is  
240 more accurate to compare the interaction distance (**Figure S7**). Most of the atoms in  
241 CEs (i.e., C, N and O) are non-coplanar, so we determine the plane approximately by  
242 mathematical methods as follows. We record C, N and O atoms in the ring as Point  $\alpha_1$ ,  
243  $\alpha_2, \dots, \alpha_n$  ( $n=15$  or  $18$ ) and the vertical distance from  $\alpha_n$  to the plane as  $d_n$ . Next, we  
244 denote the square sum of  $d_n$  as  $P_{sum}$  ( $P_{sum} > 0$ ). Then we determine the plane equation in  
245 3D coordinates, which satisfies the minimum value of  $P_{sum}$ . In other words, the plane  
246 is determined for evenly distributing C, N and O atoms on and below the plane. Lastly,  
247 Pb-CE plane distances are calculated in **Table S4**. The Pb-CE plane distances from big  
248 to small are A15C5, DA15C5, A15C5, A18C6, DA18C6, 18C6, which are consistent  
249 with the side views in **Figure S5**.

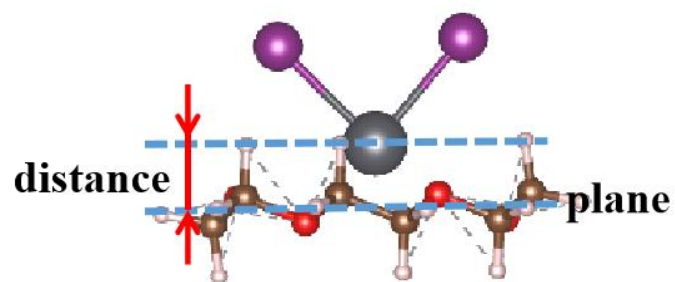

250

251 **Figure S7.** Schematic diagram of the calculation of Pb-CE plane distances. \_\_\_\_\_



252 **Note S2. Experimental methods for ultraviolet-visible titration**

253 PbI<sub>2</sub>, FAI and CEs are dissolved in anhydrous DMF to prepare the below solutions,  
254 respectively (denoted as solution ①-⑨ in **Table S5**). For the forward experiment  
255 (**Figure 2a-f**), solution⑦ is quantitatively added into solutions ①-⑥, respectively. The  
256 volume of FAI solution is used to calculate the ratio of FAI and PbI<sub>2</sub>. The reactions can  
257 be described as Equation 1-2 for PbI<sub>2</sub> solution and Equation 3-4 for PbI<sub>2</sub>-CE mixed  
258 solution in **Note S3**. CL is the shorthand for crown ether ligand (e.g., A18C6, 18C6) in  
259 the equation. It should be noted that PbI<sub>5</sub><sup>3-</sup> and PbI<sub>6</sub><sup>4-</sup> are hardly observed in solution  
260 because of their intentionally low concentrations.

261 For the reverse experiment (**Figure 2h-i**), solution⑨ is quantitatively added into  
262 solution⑧, which is described as Equation 5-6. The prepared solutions are placed in  
263 quartz cuvettes for recording photos and UV-vis tests. \_\_\_\_\_

264 Note S3. Chemical reactions for ultraviolet-visible titration

265 For forward titration,

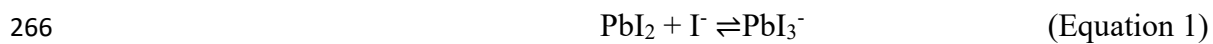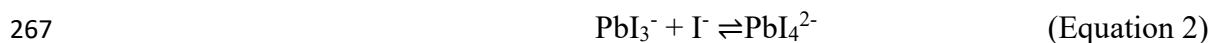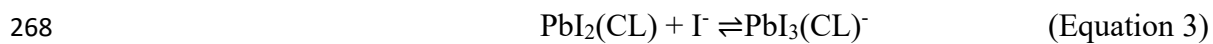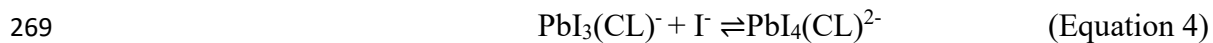

270 For reverse titration,

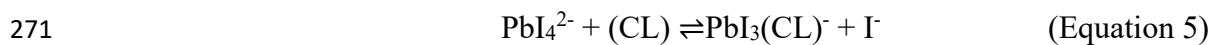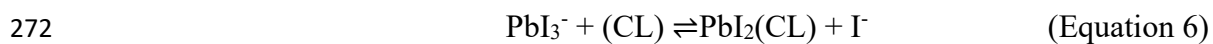

273 *Note S4. DLS analysis of iodoplumbates*

274 According to the literature<sup>14-16</sup>, the colloidal sizes are directly correlated with the  
275 colloid composition. With adding excess I<sup>-</sup>, iodoplumbates are split into smaller  
276 colloids due to the formation of iodide-rich iodoplumbates. In other words, reduced  
277 colloidal particle sizes are observed owing to the further iodation of iodoplumbates<sup>15</sup>.

278 We conducted DLS measurements of the mixture of 0.001 mol/L PbI<sub>2</sub> and 0.1  
279 mol/L FAI in DMF. In the absence of A18C6, by mixing FAI and PbI<sub>2</sub> with the molar  
280 ratio of 100:1, we monitor the colloidal sizes of 23 nm and 213 nm (**Figure S8**).  
281 Moreover, when mixing A18C6, PbI<sub>2</sub> and FAI at the molar ratio of 1:1:100, increased  
282 colloidal sizes of 43 nm and 437 nm are observed. From the inside optical photo, the  
283 solutions without and with A18C6 show dark yellowish green and nearly colorless  
284 respectively, confirming the different concentrations of iodoplumbates, in agreement  
285 with ultraviolet-visible titration.

286 In solution without A18C6, the small colloidal sizes indicate that iodide-rich  
287 iodoplumbates such as massive PbI<sub>3</sub><sup>-</sup> and PbI<sub>4</sub><sup>2-</sup> are formed, which yield smaller  
288 perovskite crystals in the films after annealing<sup>17</sup>. Less halogen sharing among [PbI<sub>6</sub>]  
289 octahedra will separate coordination units and induce a smaller colloidal framework or  
290 even individual octahedral units. Correspondingly, increased colloidal sizes in solution  
291 with A18C6 represent the suppressed iodation of iodoplumbates.

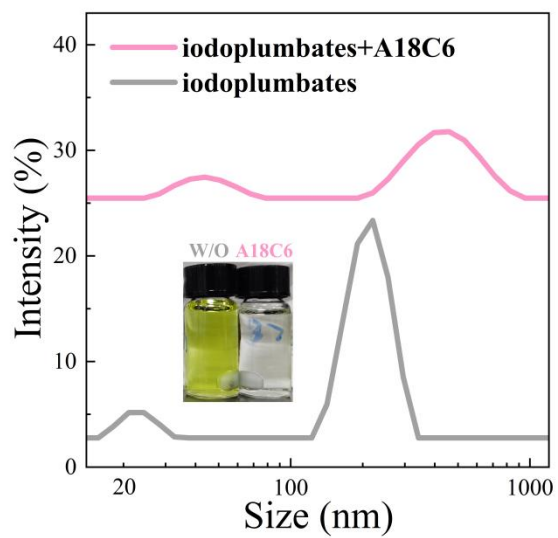

292

293

**Figure S8.** The DLS colloid size distributions in the iodoplumbates solution.

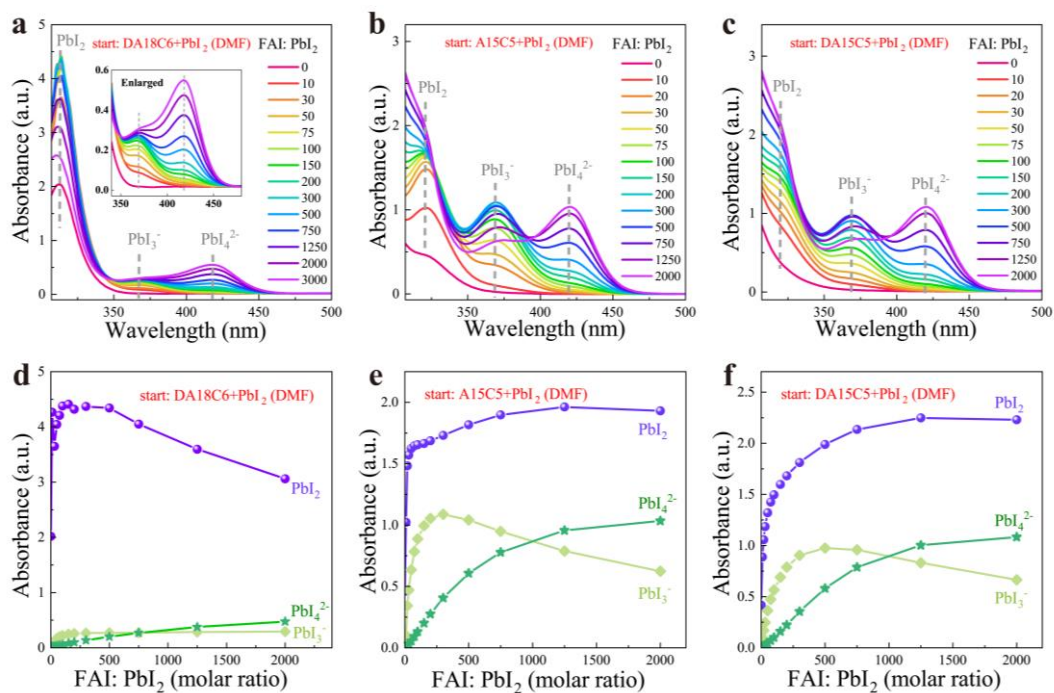

294

295 **Figure S9.** Absorbance of ultraviolet-visible titration for the forward experiment. (a-c)  
 296 Absorbance spectra of ACE-doped  $\text{PbI}_2$  solution in DMF with increasing concentration  
 297 of FAI. (d-f) Peak absorbance of  $\text{PbI}_2$ ,  $\text{PbI}_3^-$  and  $\text{PbI}_4^{2-}$  as a function of  $[\text{FAI}]:[\text{PbI}_2]$ . The  
 298 iodoplumbate species are marked in different colors.

299 Note S5. Benesi-Hildebrand (BH) analysis

300 We conducted Benesi-Hildebrand (BH) analyses<sup>18,19</sup> in Equation 7 for PbI<sub>2</sub>  
 301 solution and Equation 8 for PbI<sub>2</sub>-CE mixed solution. CL is short for crown ether ligand  
 302 in the equation. The general equation of reaction and corresponding formation constant  
 303 are shown in Equation 9-10, where ligand, M and ligand·M<sub>n</sub> are abbreviations of PbI<sub>3</sub><sup>-</sup>,  
 304 I<sup>-</sup> and PbI<sub>4</sub><sup>2-</sup>, and K<sub>f</sub> is the formation constant. Combined with Lambert-Beer Law, the  
 305 BH equation is given in Equation 11-12. A<sub>0</sub> is the initial absorbance of ligand·M<sub>n</sub>, A is  
 306 the absorbance of ligand·M<sub>n</sub> during titration, A<sub>max</sub> is the absorbance of ligand·M<sub>n</sub> in the  
 307 presence of maximum amount of I<sup>-</sup>, and [M] is the concentration of I<sup>-</sup>. Here, we assume  
 308 a 1:1 association (i.e., n=1) between CL and iodoplumbates<sup>20</sup>.

309

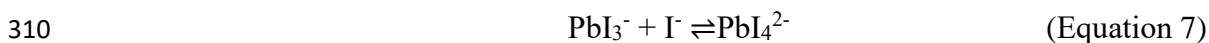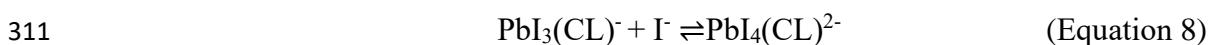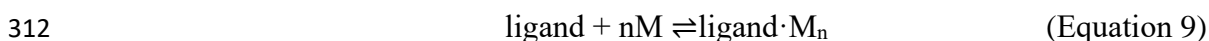

313 
$$K_f = \frac{[\text{ligand} \cdot \text{M}_n]}{[\text{ligand}] \cdot [\text{M}]^n} \quad (\text{Equation 10})$$

314 
$$\frac{1}{A - A_0} = \frac{1}{K_f(A_{\text{max}} - A_0)[\text{M}]^n} + \frac{1}{A_{\text{max}} - A_0} \quad (\text{Equation 11})$$

315 
$$\lg \frac{A - A_0}{A_{\text{max}} - A} = n \lg[\text{M}] + \lg K_f \quad (\text{Equation 12})$$

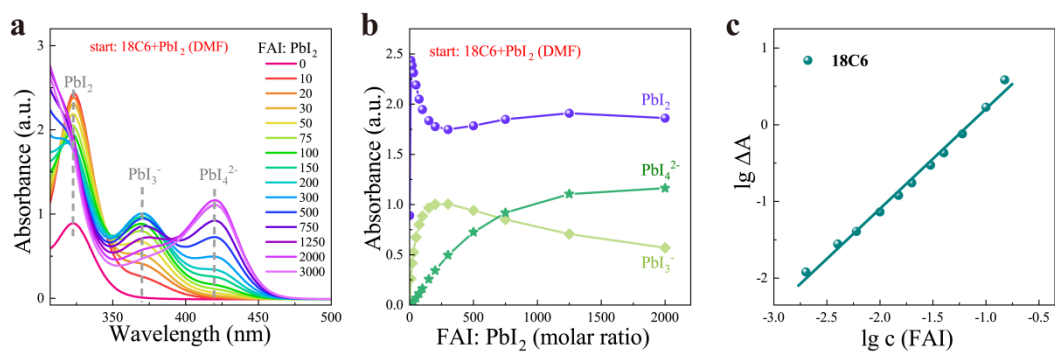

316

317 **Figure S10.** Absorbance of ultraviolet-visible titration for 18C6-doped  $\text{PbI}_2$ . (a)

318 Absorbance spectra of 18C6-doped  $\text{PbI}_2$  solution in DMF with increasing concentration

319 of FAI. (b) Peak absorbance of  $\text{PbI}_2$ ,  $\text{PbI}_3^-$  and  $\text{PbI}_4^{2-}$  as a function of [FAI]:[ $\text{PbI}_2$ ]. (c)

320 The linear fitting of BH analysis.

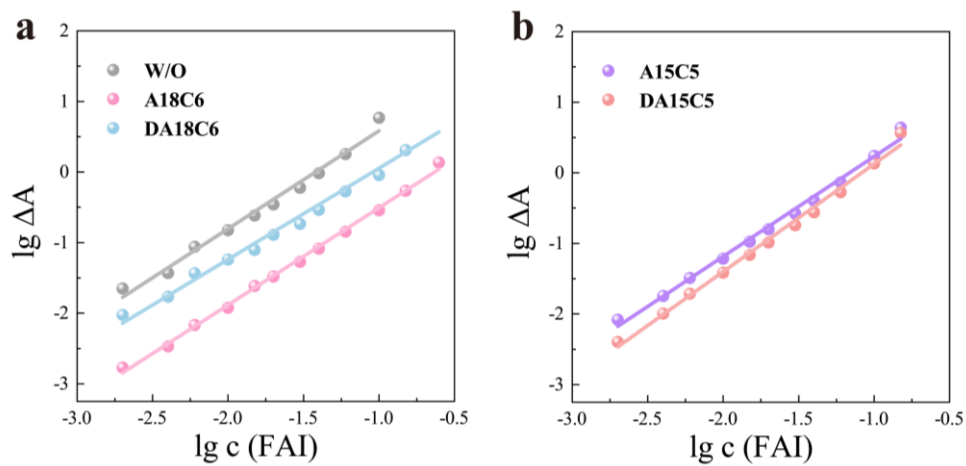

321

322

323 **Figure S11.** The linear fitting of BH analysis.

324  $\Delta A$  is short for  $(A-A_0)/(A_{\max}-A)$  and  $c$  (FAI) is the concentration of  $\Gamma$ . The formation

325 constants of  $\text{PbI}_4^{2-}$  and  $\text{PbI}_4(\text{CL})^{2-}$  are calculated in **Table S6**.



326 **Note S6. The side reactions in the precursor solution**

327 According to the literature<sup>14-16</sup>, the perovskite precursor solution is a colloidal  
328 mixture of lead polyhalide species (e.g., iodoplumbates) which act as nucleation sites  
329 during the crystallization process. It is confirmed that precursor solution suffers from  
330 degeneration during different aging conditions and produces detrimental impurities.  
331 Therefore, developing scalable and stable precursors and extending the perovskite ink  
332 shelf life are vital to batch-to-batch reproducibility.

333 The chemical reaction equations including Step A-D in **Figure S12** elucidate the  
334 aging mechanism in precursor solution. Here, organometal-halide perovskites (OHPs)  
335 are simplified as (FA, MA)PbI<sub>3</sub>. After mixing FAI/MAI and PbI<sub>2</sub>, iodoplumbates form  
336 in solution. With increasing the shelf time, formamidinium iodide (FAI) and  
337 methylammonium iodide (MAI) undergo deprotonation and produce HI (Step A)<sup>21,22</sup>.  
338 In Step B, self-condensation of FAI occurs to form the by-product s, i.e., triazine. MA  
339 can react with FAI to form N-methylformamidinium iodide (MFAI), and MFAI further  
340 reacts with MA to form N,N'-dimethylformamidinium iodide (DMFAI)<sup>23</sup>. In Step C,  
341 the degradation of DMF results in the formation of formic acid (HCOOH) and  
342 dimethylamine (DMA), and HI catalyzes the degradation<sup>24</sup>.

343 In Step D, under illumination or oxygen, HI transforms to I<sub>2</sub>. I<sub>2</sub> is easy to combine  
344 with I<sup>-</sup> and creates tri-iodide ion I<sub>3</sub><sup>-</sup>. Under visible light/UV, I<sub>2</sub> produces atomic iodine  
345 (I<sup>•</sup>), which binds with I<sup>-</sup> and generates I<sub>2</sub><sup>•-</sup>. FA<sup>+</sup> cation reacts with I<sub>2</sub><sup>•-</sup> and forms  
346 I<sub>2</sub><sup>25</sup>. These cycle reactions accelerate the formation of I<sub>2</sub>.

347 During the thermal annealing process (Step E), pure  $\alpha$ -FAPbI<sub>3</sub> films can be  
348 obtained by using fresh precursor solution due to the absence of HI. When preparing  
349 films by aged solution,  $\delta$ -FAPbI<sub>3</sub> is formed. Because HI disturbs the formation of  
350 photoactive  $\alpha$ -FAPbI<sub>3</sub> and a high concentration of HI favors non-photoactive  $\delta$ -  
351 FAPbI<sub>3</sub><sup>21</sup>.

352 Furthermore, we choose the system of Cs<sub>0.04</sub>(FA<sub>0.97</sub>MA<sub>0.03</sub>)<sub>0.96</sub>Pb(I<sub>0.97</sub>Br<sub>0.03</sub>)<sub>3</sub> in  
353 this work. The degradation processes of Step A, D and E are mainly considered for the  
354 reasons below. Firstly, MAI content is far less than FAI, so the MA-FA<sup>+</sup> reaction in Step  
355 B can be neglected. It is also reported that Cs<sup>+</sup> significantly slows down the MA-FA<sup>+</sup>  
356 reaction<sup>26</sup>. Besides, the hydrolysis of DMF (Step C) proceeds slowly at room  
357 temperature, and the usage of anhydrous DMF also decelerates the process<sup>24</sup>.

**Step A. Deprotonation of MAI and FAI**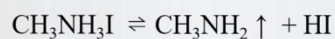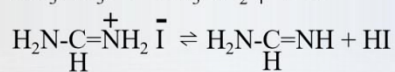**Step B. Formation of s-triazine, MFA and DMFA**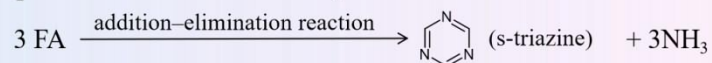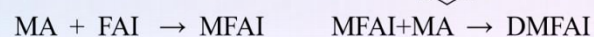**Step C. Hydrolysis of DMF**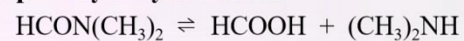**Step D. Iodide oxidation and cycle reactions**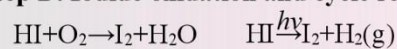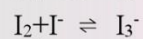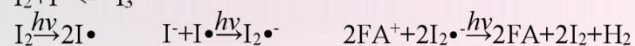**Step E. Thermal annealing and crystallization**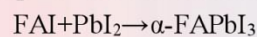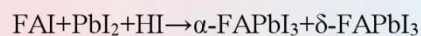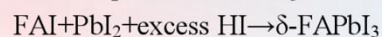

358

359 **Figure S12.** Degradation mechanisms of perovskite precursor solution. \_\_\_\_\_

360 *Note S7. The characterizations of perovskite films fabricated by N<sub>2</sub>-aged precursor*  
361 *solutions*

362 In this experiment, we prepare perovskite precursor with the composition of  
363 Cs<sub>0.04</sub>(FA<sub>0.97</sub>MA<sub>0.03</sub>)<sub>0.96</sub>Pb(I<sub>0.97</sub>Br<sub>0.03</sub>)<sub>3</sub>. The sealed perovskite precursor solutions  
364 without and with A18C6 are aged in N<sub>2</sub> glove box in dark for 0 and 120 days,  
365 respectively. 0.4 mmol/L A18C6 is added to the precursor solution.

366 As shown in **Figure S14a**, the perovskite films without and with A18C6 prepared  
367 by fresh solutions show an absorption edge of 800 nm. The sample prepared by aged  
368 solution with A18C6 exhibits a slight decrease in the wavelength of 550-650 nm and  
369 basically no change around 800 nm, while that without A18C6 presents significantly  
370 reduced light absorption from 550 nm to 800 nm. In addition, the perovskite film  
371 prepared with aged precursor solution with A18C6 shows a higher ratio of  $\alpha$ -FAPbI<sub>3</sub> /  
372  $\delta$ -FAPbI<sub>3</sub> in **Figure S14b**. Moreover, The average TRPL lifetime of perovskite films  
373 without and with A18C6 decays over the aging time of precursor, while the perovskite  
374 film with A18C6 shows less lifetime attenuation (**Figure S14c, Table S8**). This  
375 originates from the stabilization of iodoplumbates and the remarkably retarded  
376 production of HI and I<sub>2</sub> (i.e., I<sub>3</sub><sup>-</sup>) by A18C6.

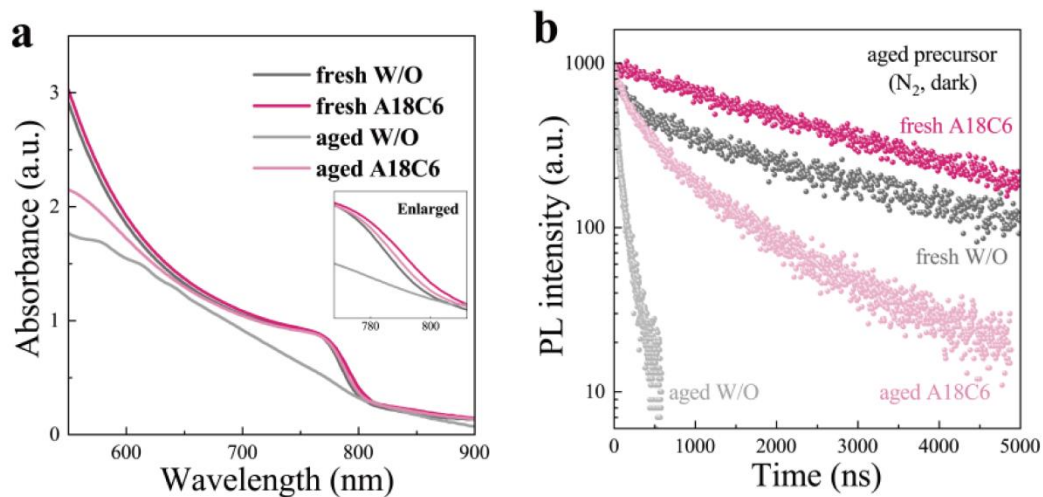

377

378 **Figure S13.** Film characterizations prepared by fresh and aged solutions. The  
 379 perovskite precursor solutions are aged in N<sub>2</sub> glove box for 0 and 120 days. (a) UV-vis  
 380 absorbance of the perovskite films. (b) TRPL decays of the perovskite films.

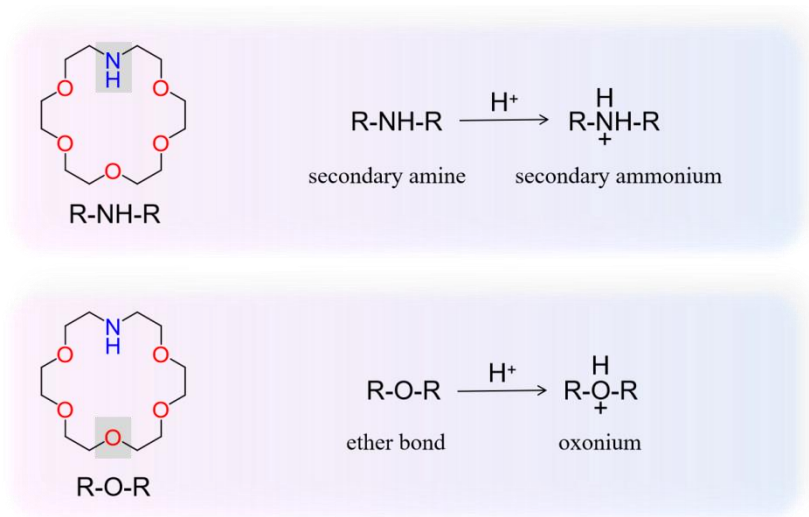

381

382 **Figure S14.** Lewis base functional groups and their reactions with hydrogen ion.

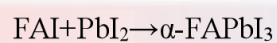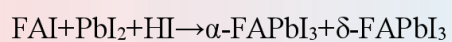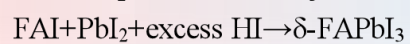

crystallization

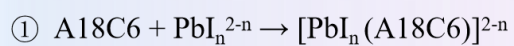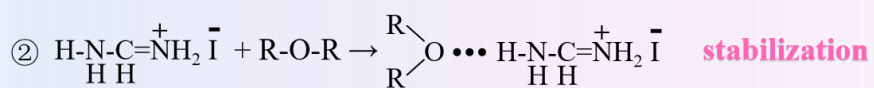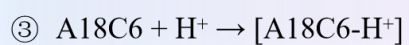

383

384 **Figure S15.** Stabilization mechanisms of perovskite precursor solution involved by

385 A18C6. \_\_\_\_\_

386 *Note S8. The stabilization mechanism by A18C6*

387 In consideration of the chemical properties of A18C6, the ether bonds and the  
388 secondary amine are the main functional groups (**Figure S14**). The stabilization  
389 mechanisms of perovskite precursor solution involved by A18C6 contain three parts  
390 (**Figure S15**). Firstly, A18C6 binds with iodoplumbates and stabilizes the colloids.  
391 Secondly, the O atom in A18C6 forms hydrogen bond with the H atom in FA<sup>+</sup> cation,  
392 inhabiting the degradation of FAI. Thirdly, the electronegative O and N atoms in A18C6  
393 bind with H<sup>+</sup> via lone pair electrons and produce oxonium and secondary ammonium,  
394 which prevent HI to accelerate the formation of  $\delta$ -FAPbI<sub>3</sub>.

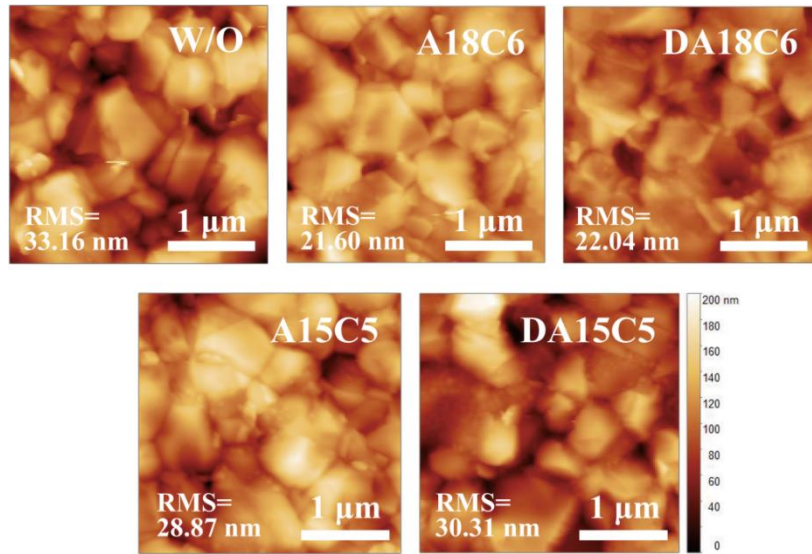

395

396 **Figure S16.** AFM topography of perovskite films. Root mean square roughness (RMS)  
397 is indicated inside the figure.



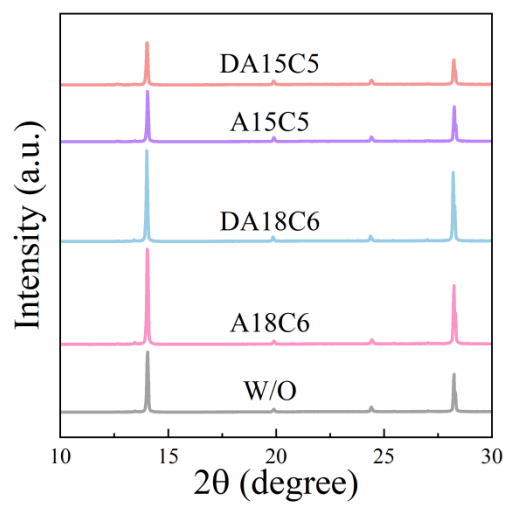

398

399 **Figure S17.** XRD patterns of perovskite films, W/O and with ACE modification,  
400 respectively.

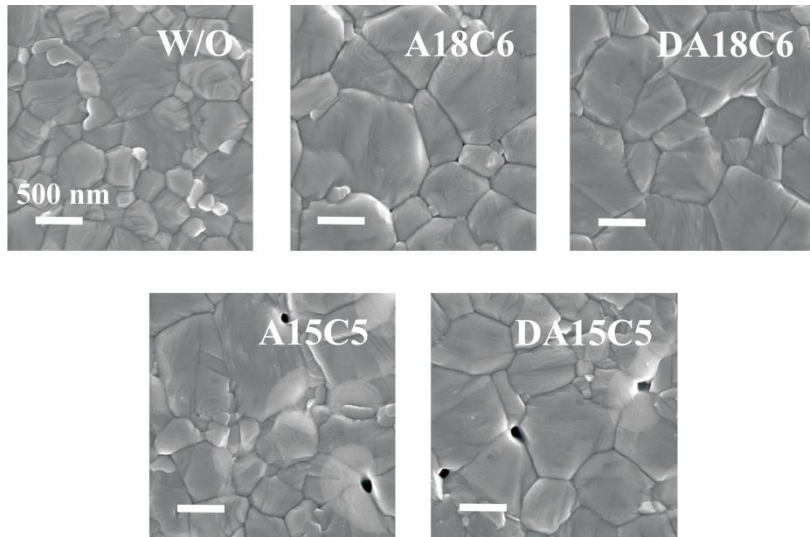

401

402 **Figure S18.** Surface SEM images of the perovskite films without and with ACEs

403 modification under high magnification.

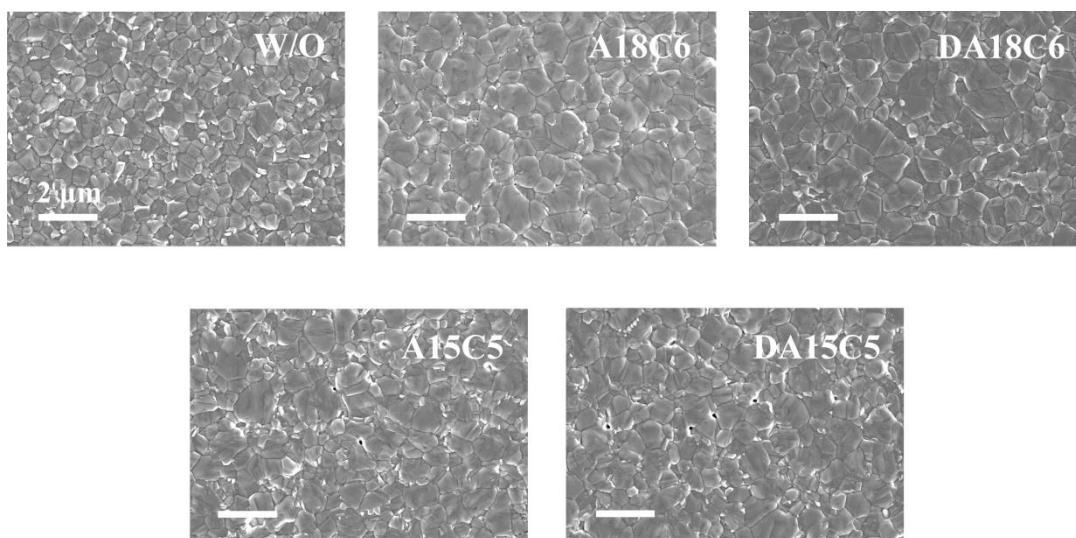

404

405 **Figure S19.** Surface SEM images of the perovskite films, without and with ACEs  
406 modification under low magnification.

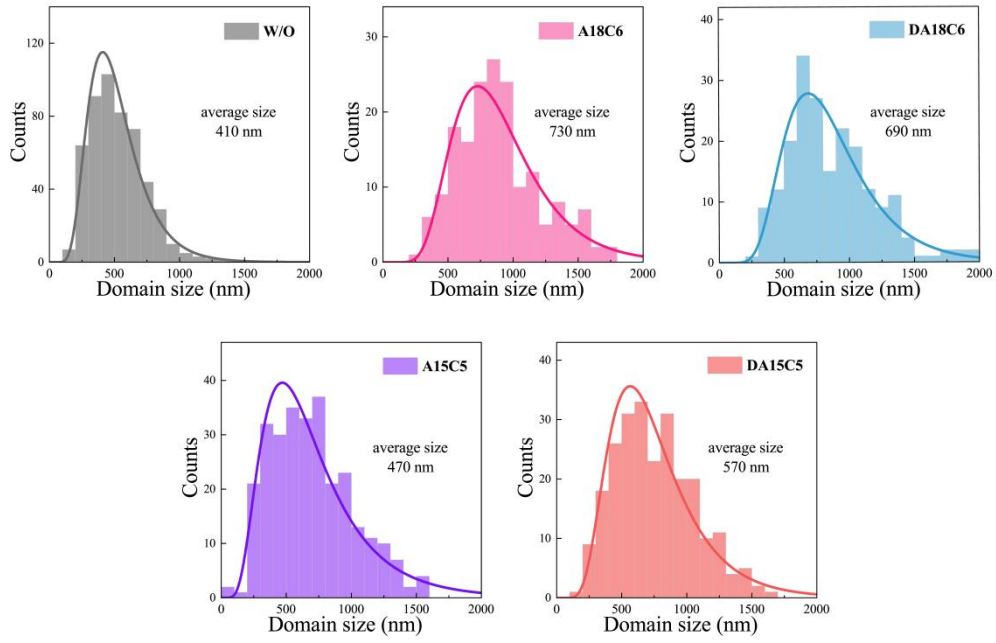

407

408 **Figure S20.** Statistical graphs of average domain size derived from low magnification  
 409 SEM images of perovskite films.

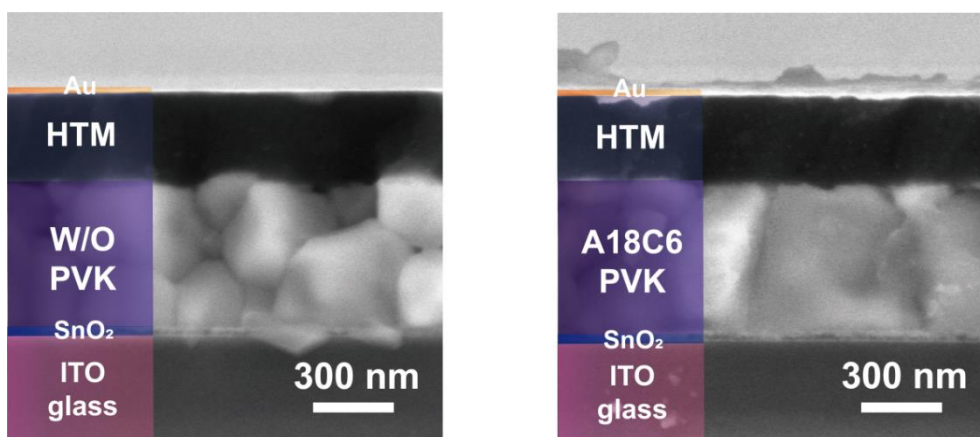

410

411 **Figure S21.** Cross-section SEM images of devices without and with A18C6  
412 modification.

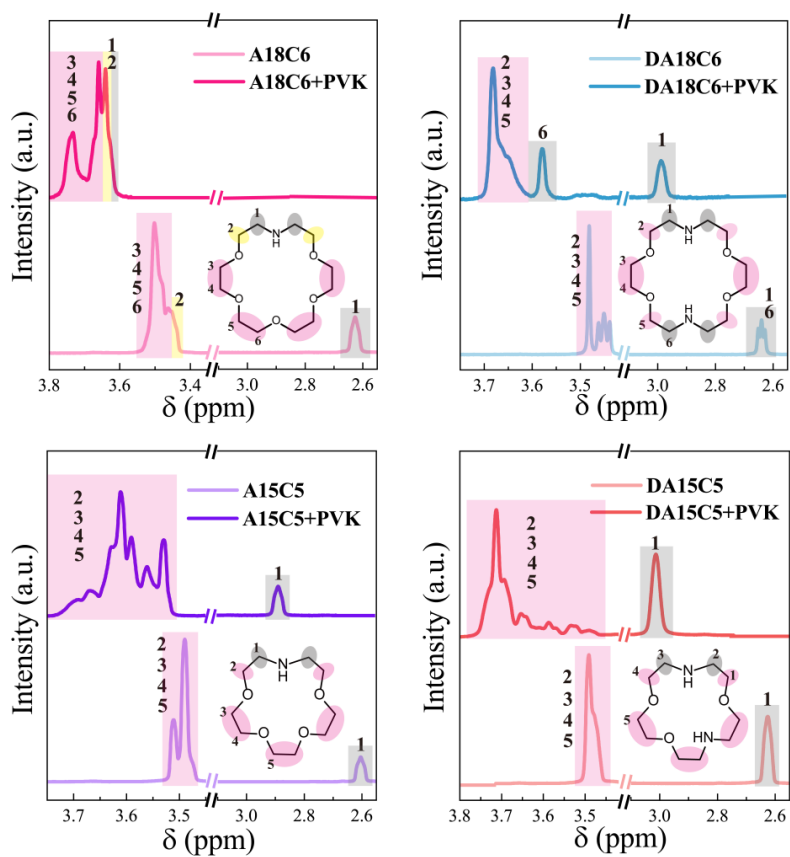

413

414 **Figure S22.** Enlarged  $^1\text{H}$ -NMR liquid-state spectra of ACE solutions and ACE-PVK  
 415 solutions. The hydrogen atoms on different carbon atoms are marked in different colors.

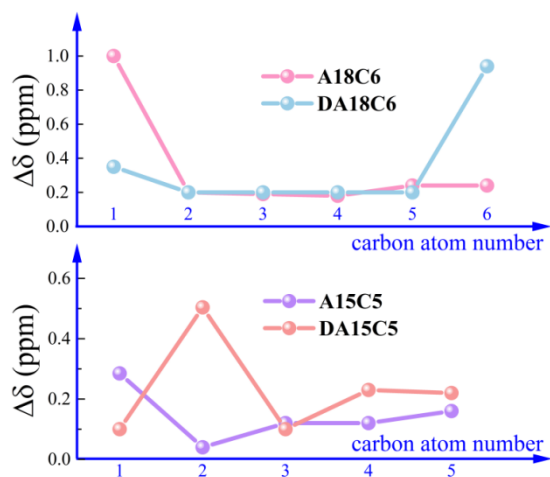

416

417 **Figure S23.** Chemical shift change ( $\Delta\delta$ ) between ACE-PVK and ACE, calculated by  
 418 the following formula:  $\Delta\delta = \delta(\text{ACE-PVK}) - \delta(\text{ACE})$ . The positions of H atoms are  
 419 distinguished by integrated peak areas in NMR spectra. The average chemical change  
 420 ( $\Delta\delta_{\text{ave}}$ ) values of A18C6, DA18C6, A15C5 and DA15C5 are 0.342, 0.348, 0.145 and  
 421 0.231, respectively.

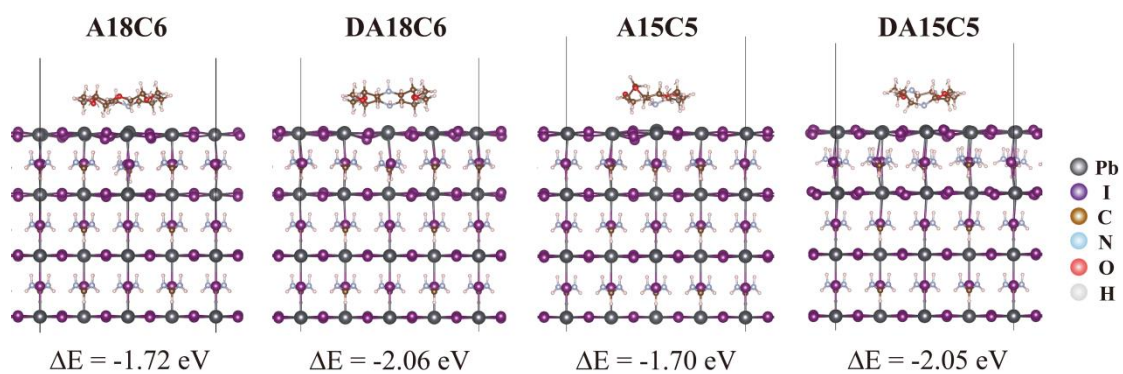

422

423

424

**Figure S24.** The DFT-optimized atomic structure of ACEs binding on the perovskite surface.



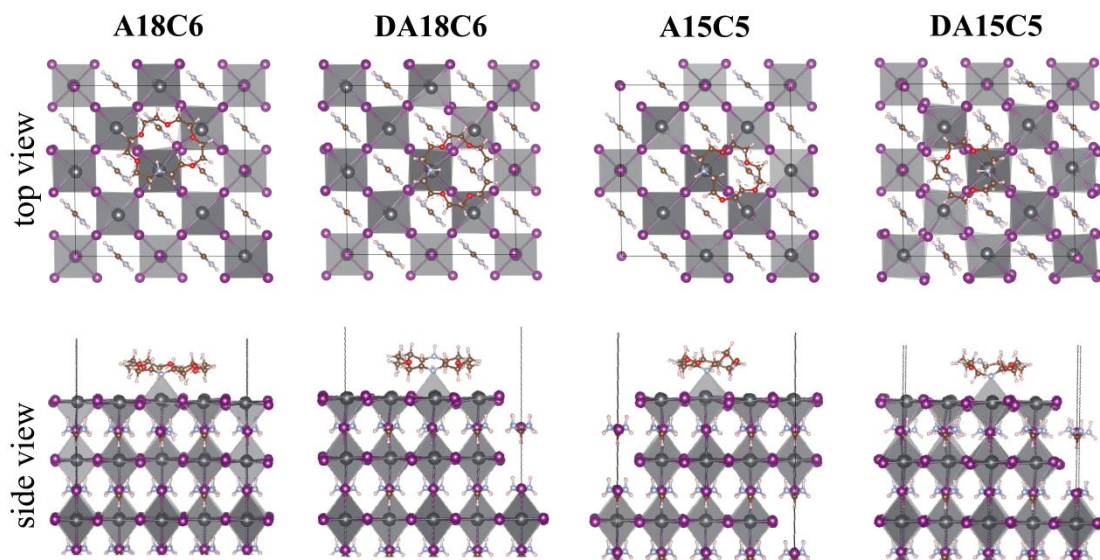

425

426 **Figure S25.** Top and side views of the DFT-optimized atomic structure of ACEs  
 427 binding on the perovskite surface. The brown, white, red, ice-blue, gray and purple  
 428 colors indicate C, H, O, N, Pb and I atoms respectively.

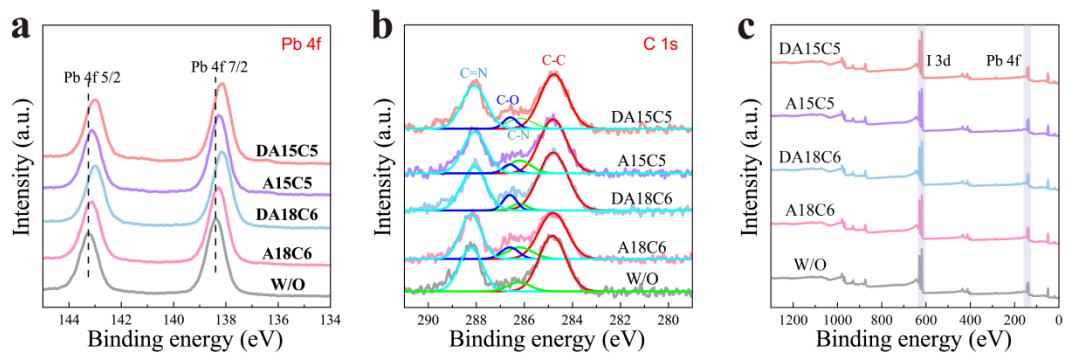

429

430 **Figure S26.** High-resolution XPS spectra of (a) Pb 4f, (b) C 1s and (c) full spectra of

431 perovskite films.

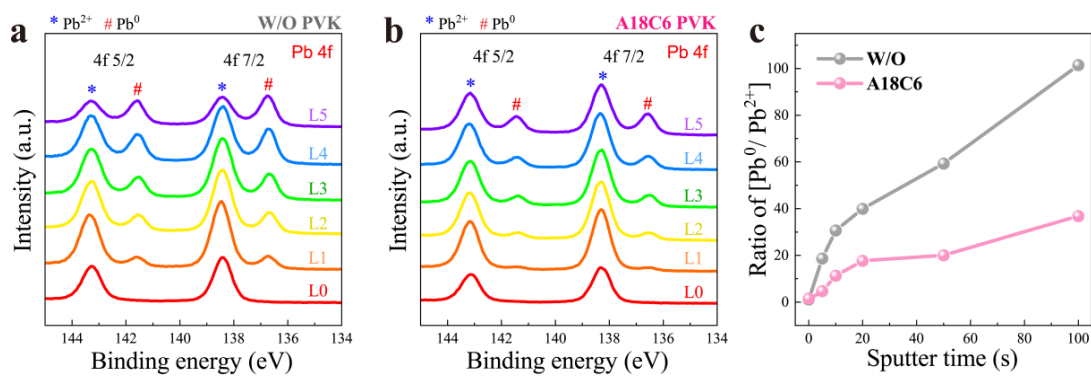

432

433 **Figure S27.** XPS depth profiles of perovskite films. (a, b) Pb 4f of (a) W/O and (b) with  
 434 A18C6. L0 is the surface layer without ion beam etching. (c) The ratio (%) of Pb<sup>0</sup> and  
 435 Pb<sup>2+</sup> with the variation of depth.

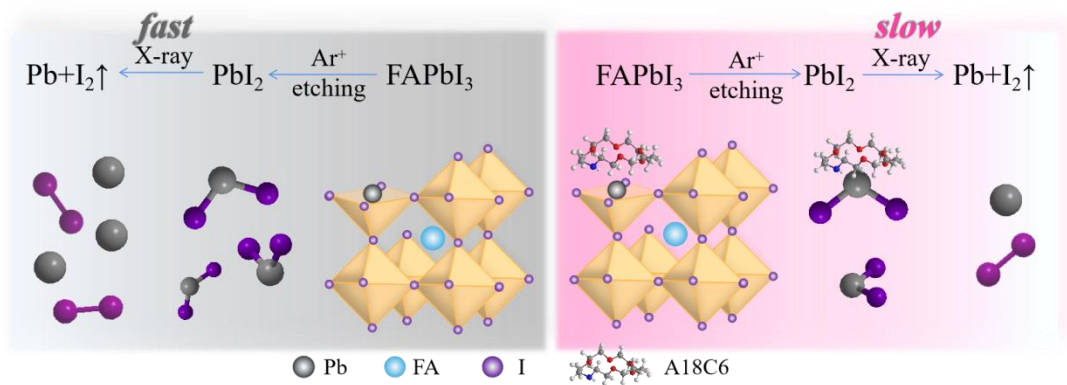

436

437 **Figure S28.** The schematic diagram showing the degradation of FAPbI<sub>3</sub> to PbI<sub>2</sub> and Pb.

438 *Note S9. Commentary of depth-resolved XPS*

439 We carried out depth-resolved XPS analysis of perovskite films without and with  
440 A18C6, and calculated the ratio of  $\text{Pb}^0$  and  $\text{Pb}^{2+}$  (%) with the variation of depth (**Figure**  
441 **S27**). The XPS spectra of Pb 4f level range exhibit two main peaks of Pb 4f  $_{5/2}$  and Pb  
442 4f  $_{7/2}$  derived from  $\text{Pb}^{2+}$ , along with two weak peaks which attribute to metallic Pb. The  
443 ratios of  $[\text{Pb}^0/\text{Pb}^{2+}]$  gradually increase in perovskite films without and with A18C6 as  
444 the depth increases, suggesting the degradation of  $\text{PbI}_2$ <sup>16</sup>. However, the perovskite film  
445 with A18C6 shows less degradation, which probably suppresses the deterioration of  
446 performance and operational stability of PSCs. As shown in **Figure S28**, A18C6  
447 inhibits the decomposition of  $\text{PbI}_2$  and the production of Pb. We propose that the  
448 stabilization effect results from the A18C6- $\text{PbI}_2$  coordination interaction.

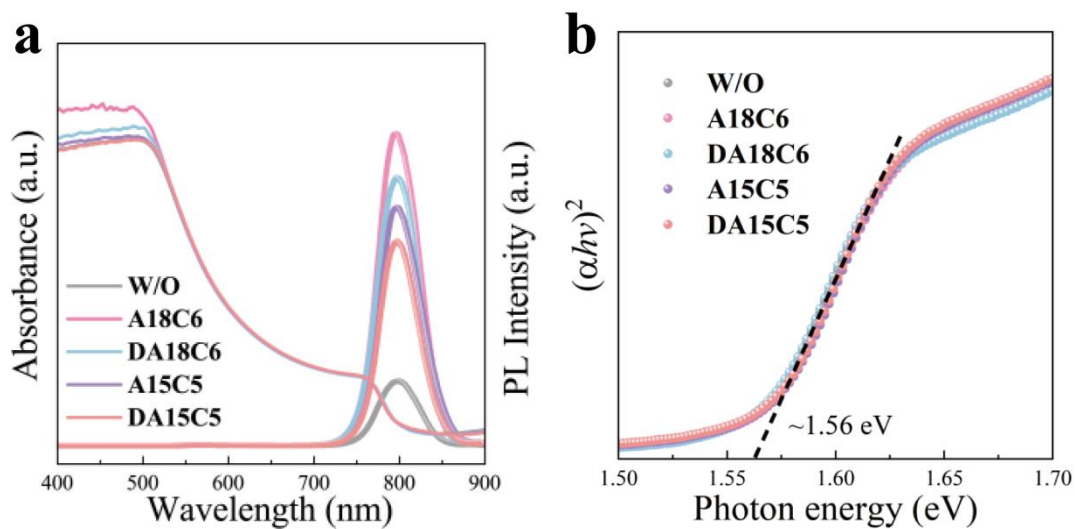

449

450 **Figure S29.** (a) UV-vis absorption and steady-state photoluminescence spectra of the  
 451 perovskite films. (b) Optical band-gap calculations of perovskite films, without and  
 452 with ACEs modification, based on UV-vis absorption spectra by using Tauc-plot  
 453 method. The bandgap is ~1.56 eV.

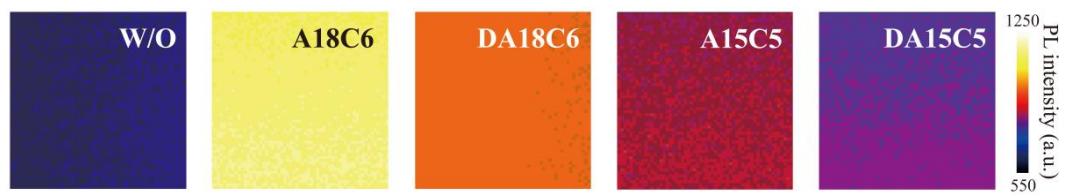

454

455 **Figure S30.** PL mapping of the perovskite films. Data were obtained over an area of  
456  $40\ \mu\text{m} \times 40\ \mu\text{m}$ .

457

458

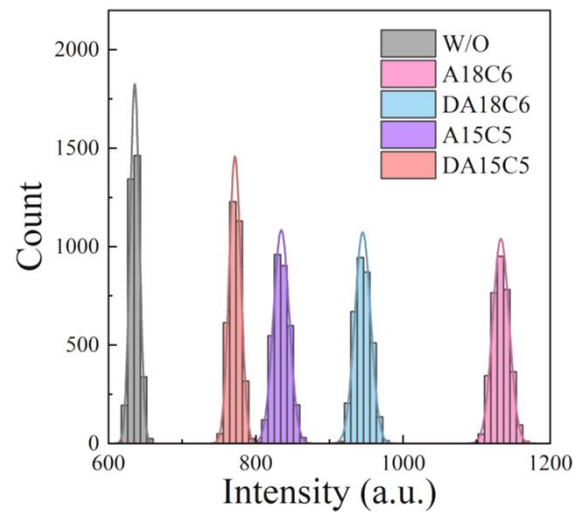

459

460 **Figure S31.** The corresponding statistics diagrams of PL intensity in PL mapping of  
461 perovskite films. \_\_\_\_\_



462 *Note S10. Details for Mott-Schottky plots*

463 We measured Mott-Schottky plots based on Mott-Schottky equation:

464 
$$C^{-2} = 2(V_{\text{bi}} - V)/(A^2 e \epsilon_0 \epsilon_r N_A) \quad (\text{Equation 13})$$

465 where  $V_{\text{bi}}$  is the build-in potential,  $V$  is the applied voltage,  $\epsilon_0$  is the vacuum permittivity,  
466  $\epsilon_r$  is the relative dielectric constant,  $e$  is the electron charge, and  $N_A$  is the carrier  
467 concentration.

468 The build-in potential is calculated to study the influence of trap states on charge  
469 transport. A higher  $V_{\text{bi}}$  provides an enhanced driving force for photogenerated carrier  
470 separation, resulting in extended depletion region and reduced electron-hole  
471 recombination<sup>28</sup>.

472

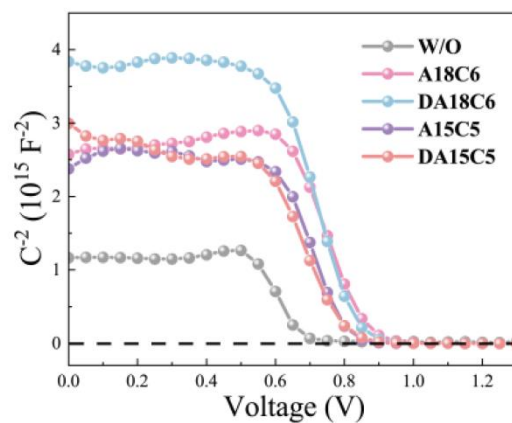

473

474 **Figure S32.** Mott-Schottky plots of PSCs. The  $V_{bi}$  values are 0.682 V, 0.807 V, 0.783  
 475 V, 0.724 V and 0.693 V for W/O, A18C6, DA18C6, A15C5 and DA15C5 PSCs,  
 476 respectively.

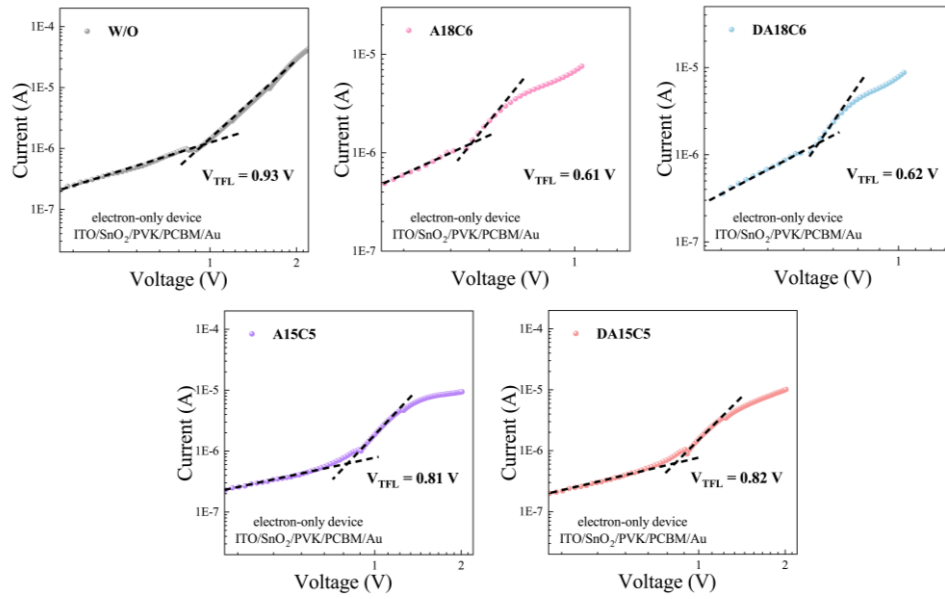

477

478 **Figure S33.** Space-charge limited current characteristics of electron-only devices.

479

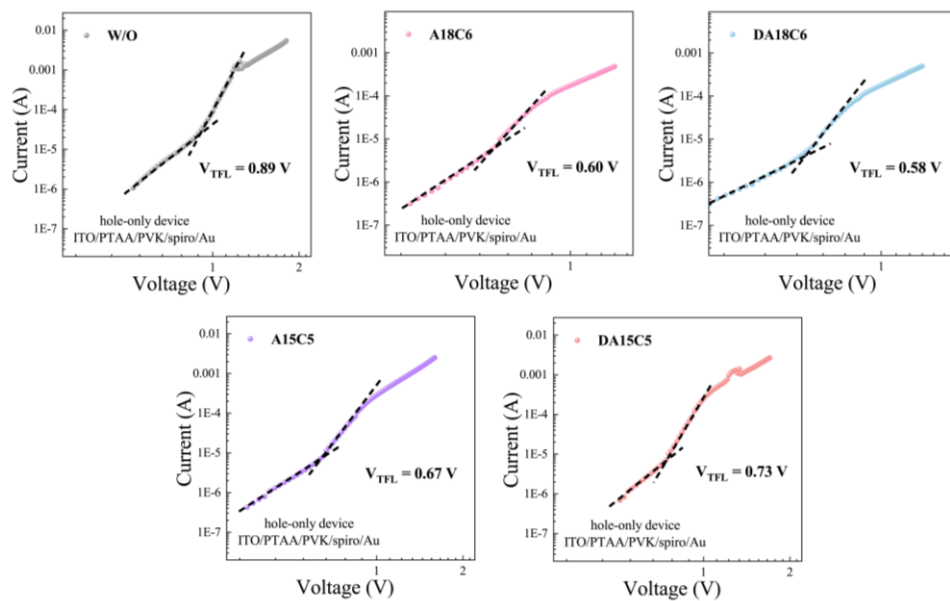

480

481 **Figure S34.** Space-charge limited current characteristics of hole-only devices.

482 *Note S11. Details for light intensity-dependent  $V_{oc}$  measurements*

483 We studied the light intensity-dependent  $J$ - $V$  characteristics of PSCs. The  
484 relationship between  $V_{oc}$  and light intensity ( $P_{light}$ ) can be expressed by Equation 14

485 
$$V_{oc} = (nkT/q) \ln (P_{light}) \quad (\text{Equation 14})$$

486 where  $n$  is the ideality factor of the diode which is in the range of 1-2,  $k$ ,  $T$  and  $q$   
487 represent the ideality factor, Boltzmann constant, the absolute temperature and the  
488 elementary charge, respectively. Usually, a slope higher than 1  $kT/q$  suggests the  
489 existence of trap-assisted recombination<sup>29</sup>. A slope close to 1 indicates reduced trap-  
490 assisted recombination.

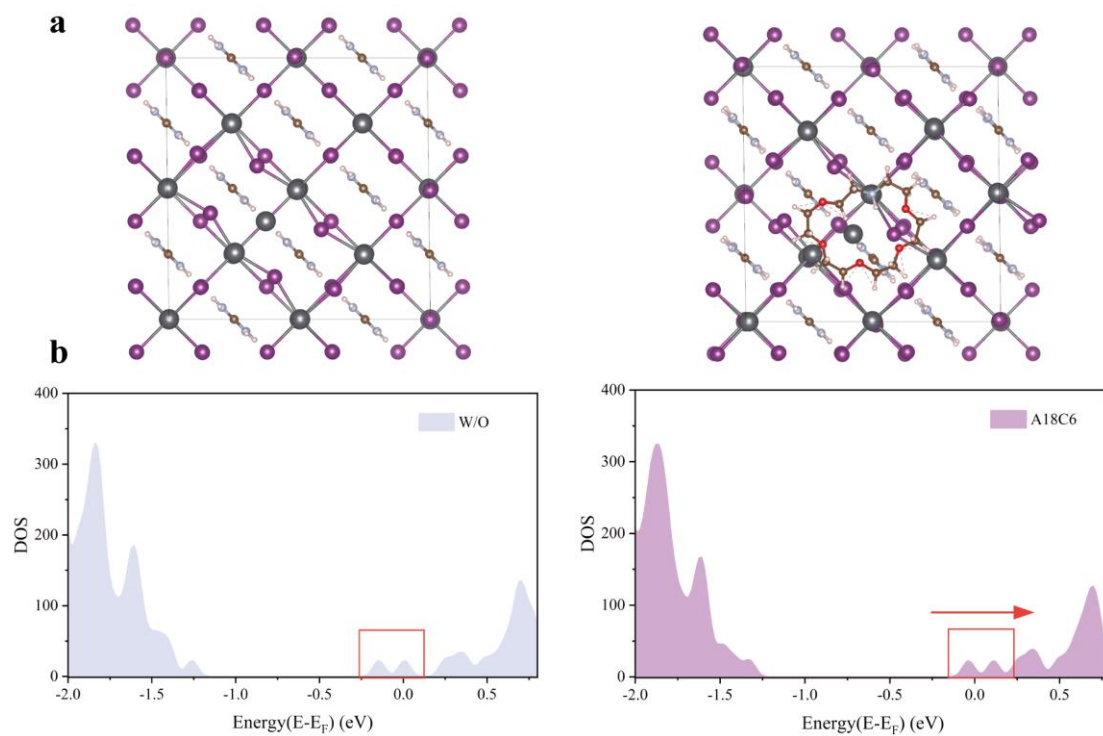

491

492 **Figure S35.** (a) Adsorption structure of the surface Pb<sub>I</sub> antisite defect without or with

493 A18C6 treatment. (b) Density of states (DOS) of the surface Pb<sub>I</sub> antisite defect

494 without or with A18C6 treatment.

495

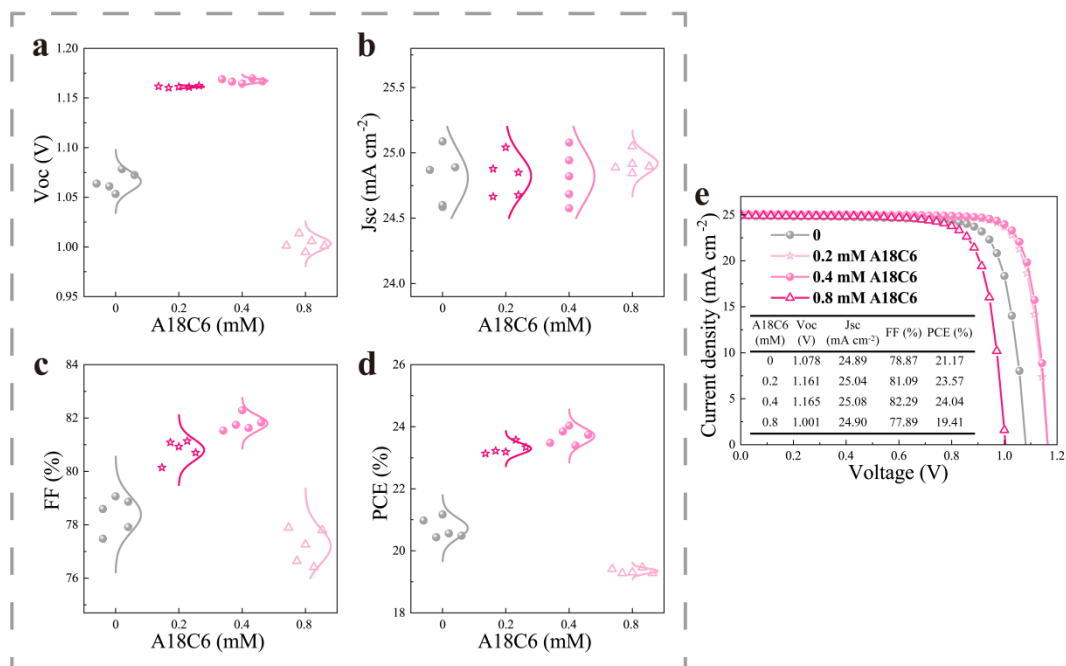

496

497

498 **Figure S36.** Performance of PSCs without and with A18C6 modification. (a-d) The  
 499 statistical distribution of (a)  $V_{oc}$ , (b)  $J_{sc}$ , (c) FF, and (d) PCE. (e)  $J$ - $V$  characteristics of  
 500 the champion devices.

501 Notes:

502 When 0.2 mmol/L A18C6 is used, the performance of PSCs is improved. When  
 503 the concentration is increased to 0.4 mmol/L, the devices yield the best PCE. Further  
 504 increasing the concentration to 0.8 mmol/L results in serious device performance  
 505 degradation.

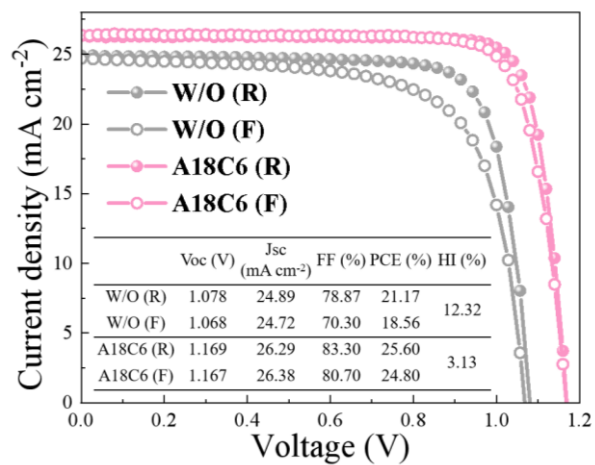

506

507 **Figure S37.** *J-V* characteristics of champion devices under reverse scan (R) and  
 508 forward scan (F), with an active area of 0.08313 cm<sup>2</sup>.



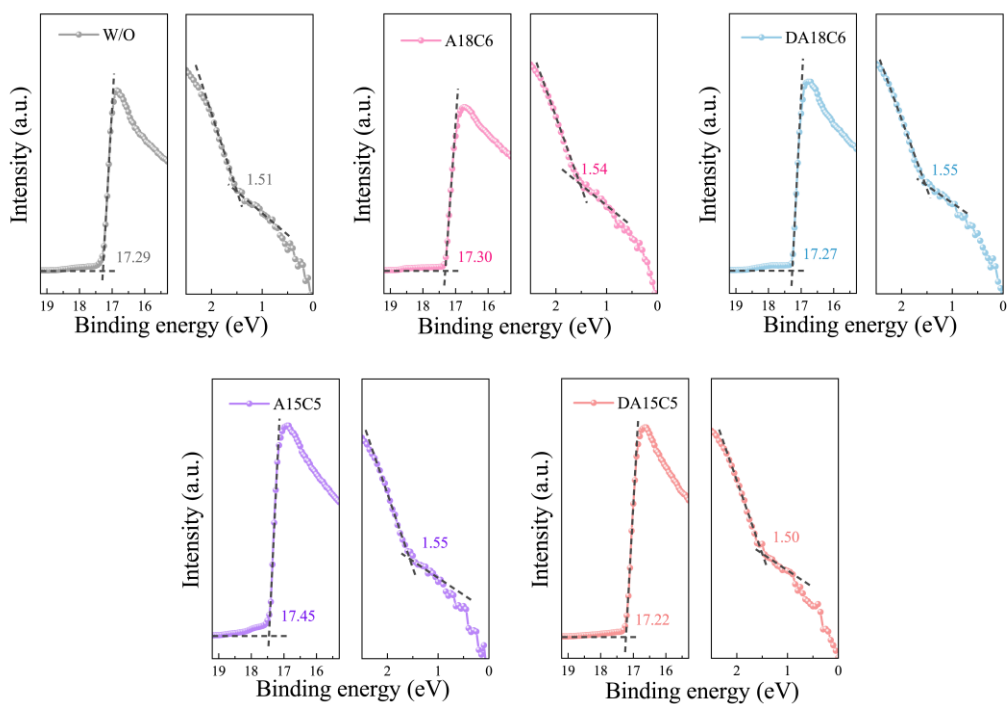

509

510 **Figure S38.** The high-binding-energy and the low-binding-energy cutoffs in UPS  
 511 spectra of perovskite films, without and with ACEs modification.

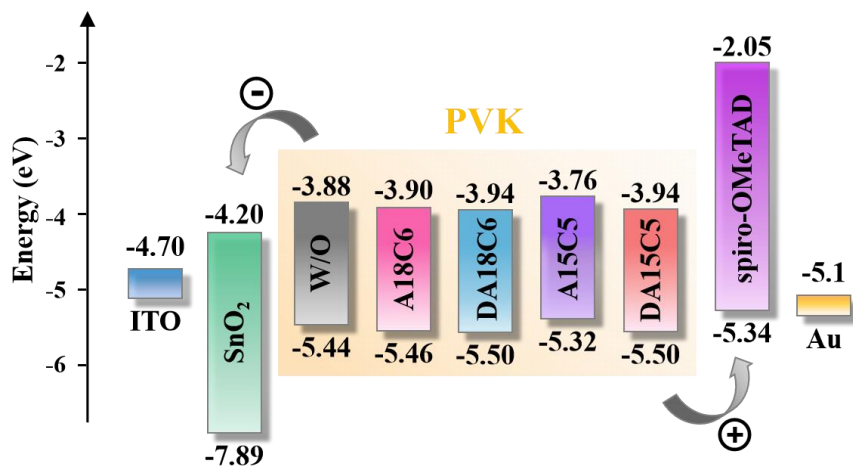

512

513 **Figure S39.** Energy band diagrams of perovskite solar cells based on a structure of  
 514 ITO/SnO<sub>2</sub>/PVK/spiro-OMeTAD/Au. \_\_\_\_\_

515 *Note S12. Details for UPS measurements*

516 We conducted ultraviolet photoelectron spectroscopy (UPS) to investigate the  
517 energy band structure of PSCs with an architecture of ITO/SnO<sub>2</sub>/PVK/spiro-  
518 OMeTAD/Au. The surface band structures of perovskite layers without and with ACEs  
519 show little change due to the trace amount of ACEs (**Figure S38-39**).

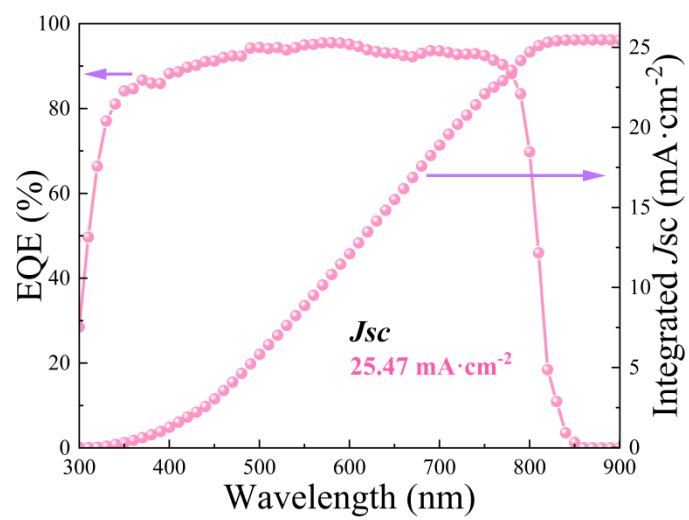

520

521

**Figure S40.** External quantum efficiency (EQE) spectrum of champion device.

522

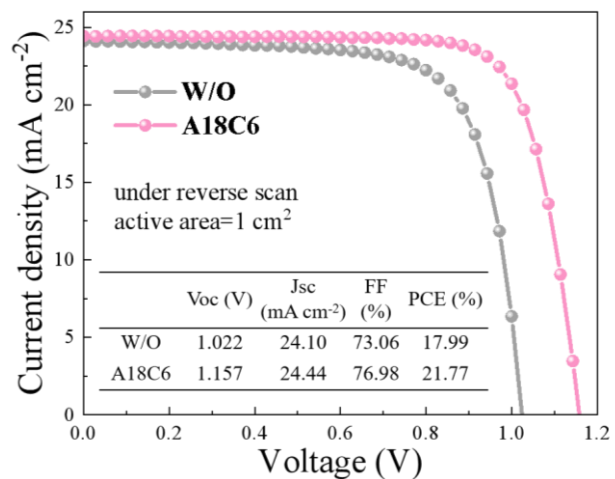

523

524 **Figure S41.** *J-V* characteristics of the champion devices with an active area of 1.0 cm<sup>2</sup>.

525

---

526 **Note S13. Synthesis and characterizations of single crystals**

527 We synthesized FAPbI<sub>3</sub> and MAPbBr<sub>3</sub> single crystals by inverse temperature  
528 crystallization (ITC) method<sup>30</sup>, and the details were described in Methods. In **Figure**  
529 **S42a**, in the left picture, the solution is at room temperature. In the right picture, the  
530 solution is 150 °C after gradient heating, and some mosaic crystals are grown due to  
531 fast heating of solution and high solution concentration. According to literature, big and  
532 well-shaped single crystals are often used as X-ray detectors, which can be obtained by  
533 low precursor concentration and slow heating of solution<sup>30</sup>. However, single crystals  
534 are just used as solutes of perovskite precursors in our work, so the shape and size of  
535 crystals are not strictly required. Besides, large crystals are not easy to weigh, so we  
536 grind single crystals to powder. Pictures of freshly prepared FAPbI<sub>3</sub> crystals are shown  
537 in **Figure S42b-c**. The  $\alpha$ -FAPbI<sub>3</sub> crystals are shiny black with the side-length of 2-6  
538 mm. The cubic phase ( $\alpha$ -FAPbI<sub>3</sub>) suffers from lattice stress and is not stable at room  
539 temperature, thus it transforms into yellow phase ( $\delta$ -FAPbI<sub>3</sub>) spontaneously even in  
540 nitrogen atmosphere. As **Figure S42d** shows, the freshly-prepared FAPbI<sub>3</sub> crystals are  
541 black, and they experience fast phase transition to  $\delta$ -FAPbI<sub>3</sub>. After 24 h storage in  
542 nitrogen, almost all the  $\alpha$ -FAPbI<sub>3</sub> crystals transform to  $\delta$ -FAPbI<sub>3</sub>.

543 In **Figure S42e**, bright orange MAPbBr<sub>3</sub> crystals are grown at 100 °C in the third  
544 hour of crystallization. The nanocubes are partly inlaid because of fast heating of  
545 solution and high solution concentration as the discussion above. Tetragonal MAPbBr<sub>3</sub>  
546 crystals with the side-length of 3-6 mm are grown, dried and collected (**Figure S42f-**  
547 **h**).

548 In order to verify the purity of products, we ground single crystals to powder and  
549 performed XRD measurements. In **Figure S42i**, we prepared two samples, which are  
550  $\delta$ -FAPbI<sub>3</sub> (yellow line) and  $\alpha$ -FAPbI<sub>3</sub> (black line), respectively. The powder XRD of  $\delta$ -  
551 FAPbI<sub>3</sub> coincides with previous reports. Due to the instability of the black phase, it  
552 rapidly transforms into the yellow phase during the XRD measurement in air (RH 50-  
553 60%), so the XRD pattern of the  $\alpha$ -FAPbI<sub>3</sub> sample is actually a mixture of  $\alpha$  and  $\delta$   
554 phases. The characteristic peaks of  $\alpha$ -FAPbI<sub>3</sub> are marked in the picture. In **Figure S42j**,  
555 the XRD pattern of MAPbBr<sub>3</sub> matches well with previous literature.

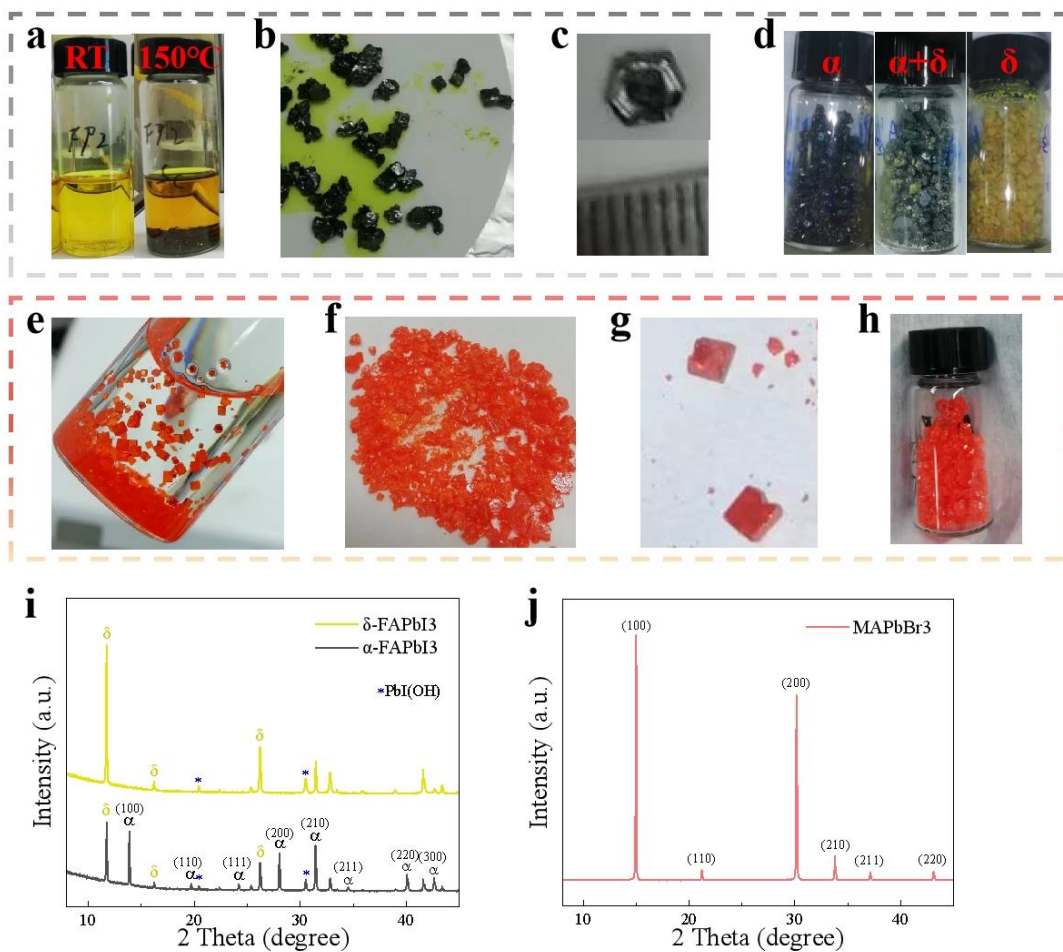

556

557 **Figure S42.** (a)  $\alpha$ -FAPbI<sub>3</sub> crystal growth at different time intervals. Left, at room  
 558 temperature (RT), before heating. Right, at 150 °C, the fifth hour. (b,c) Pictures of  $\alpha$ -  
 559 FAPbI<sub>3</sub> crystals. (d) The phase transition of  $\alpha$ -FAPbI<sub>3</sub> to  $\delta$ -FAPbI<sub>3</sub>. (e) MAPbBr<sub>3</sub> crystal  
 560 growth at 100 °C, the third hour. (f-h) Pictures of MAPbBr<sub>3</sub> crystals. (i) XRD pattern  
 561 of FAPbI<sub>3</sub> powder. (j) XRD pattern of MAPbBr<sub>3</sub> powder.

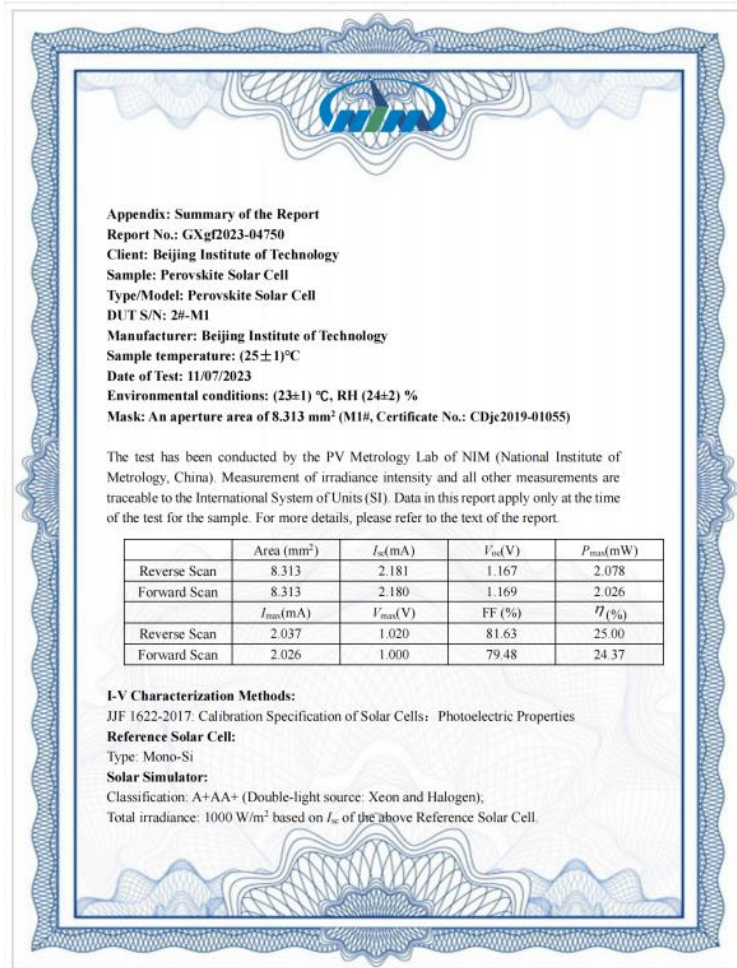

562

563 **Figure S43.** Certification report of the champion device with crown ether modification  
 564 by National Institute of Metrology of China (NIM).



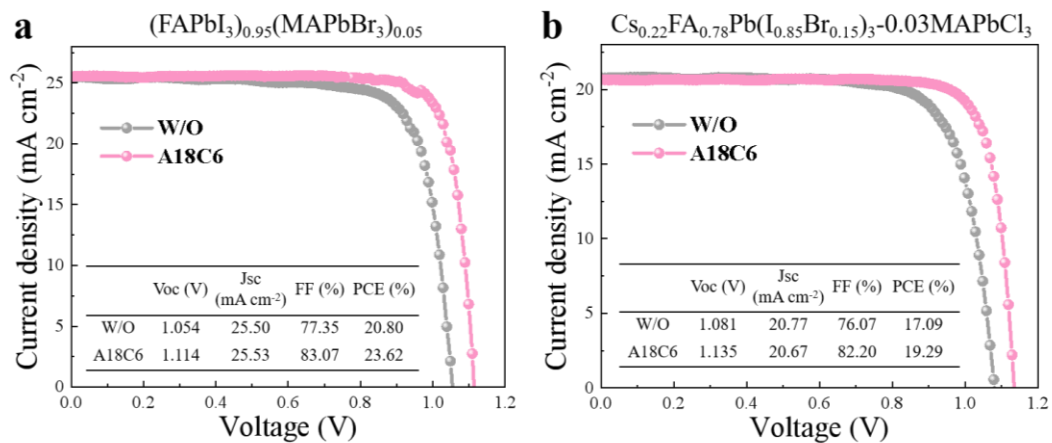

565

566 **Figure S44.** *J-V* characteristics of the champion devices without and with A18C6,  
 567 containing (a) 1.52 eV  $[(\text{FAPbI}_3)_{0.95}(\text{MAPbBr}_3)_{0.05}]$  perovskite and (b) 1.67 eV  
 568  $[\text{Cs}_{0.22}\text{FA}_{0.78}\text{Pb}(\text{I}_{0.85}\text{Br}_{0.15})_3-0.03\text{MAPbCl}_3]$  perovskite. The device structure is  
 569 ITO/SnO<sub>2</sub>/PVK/spiro-OMeTAD/Au.

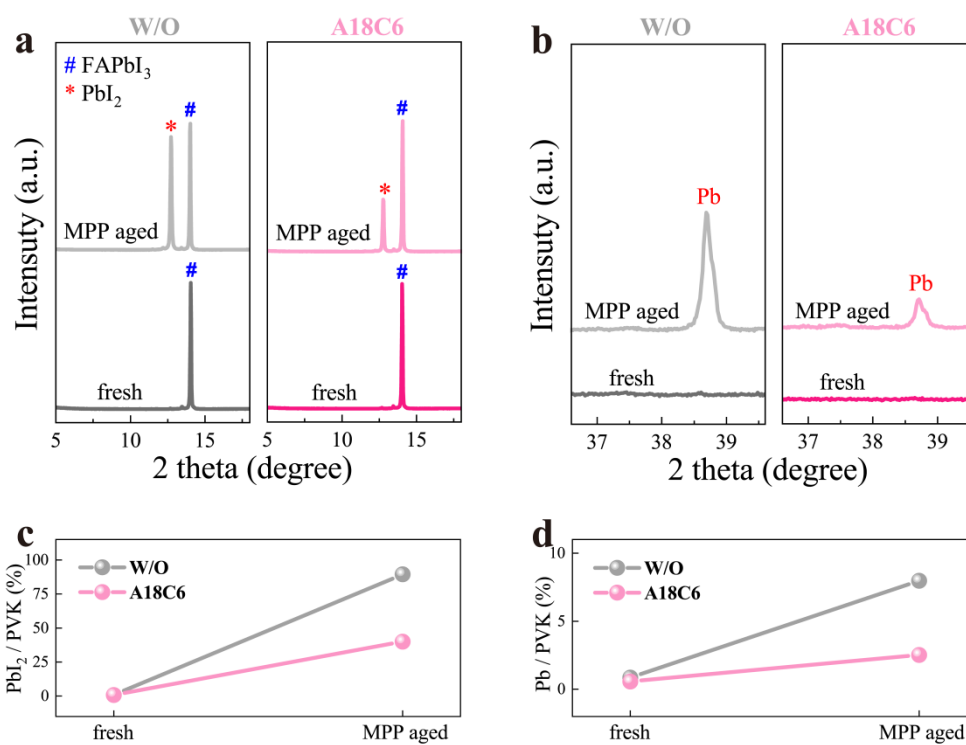

570

571

572

**Figure S45.** (a,b) Enlarged XRD patterns of the fresh and illumination-aged perovskite films. (c,d) The ratios between PbI<sub>2</sub>, Pb and  $\alpha$ -FAPbI<sub>3</sub> phase.

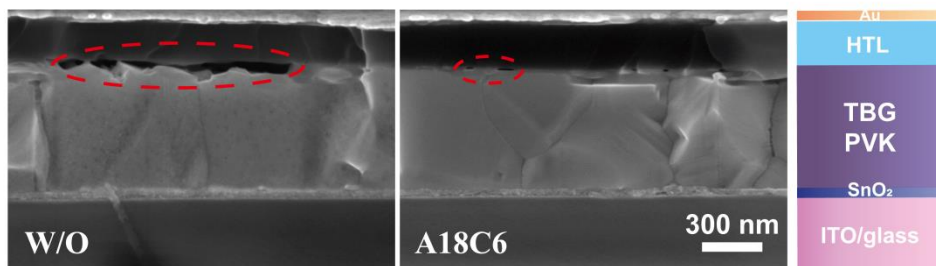

573

574 **Figure S46.** Cross-section SEM images of MPP tracking aged PSCs. Cracks and voids  
575 of perovskite were circled with red dotted lines. TBG PVK is short for typical-bandgap  
576 perovskite, and HTL is short for hole transport layer. \_\_\_\_\_

577 *Note S14. The decomposition pathways of PSCs*

578 An overview of decomposition pathways of the illumination-induced PSCs is  
579 illustrated by the equations<sup>31</sup>. PSCs starts to decompose and form defects at the  
580 structurally vulnerable region (i.e., grain boundaries and PVK/HTL interface). The  
581 decomposition generates gas species and PbI<sub>2</sub> (Equation 15). Then PbI<sub>2</sub> degrades to Pb<sup>0</sup>  
582 and I<sub>2</sub> (Equation 16). A18C6 passivates the defects at grain boundaries and interfaces,  
583 thus effectively suppresses the decomposition of PSCs.

584

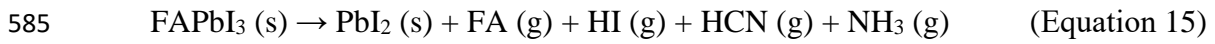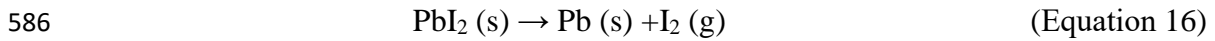

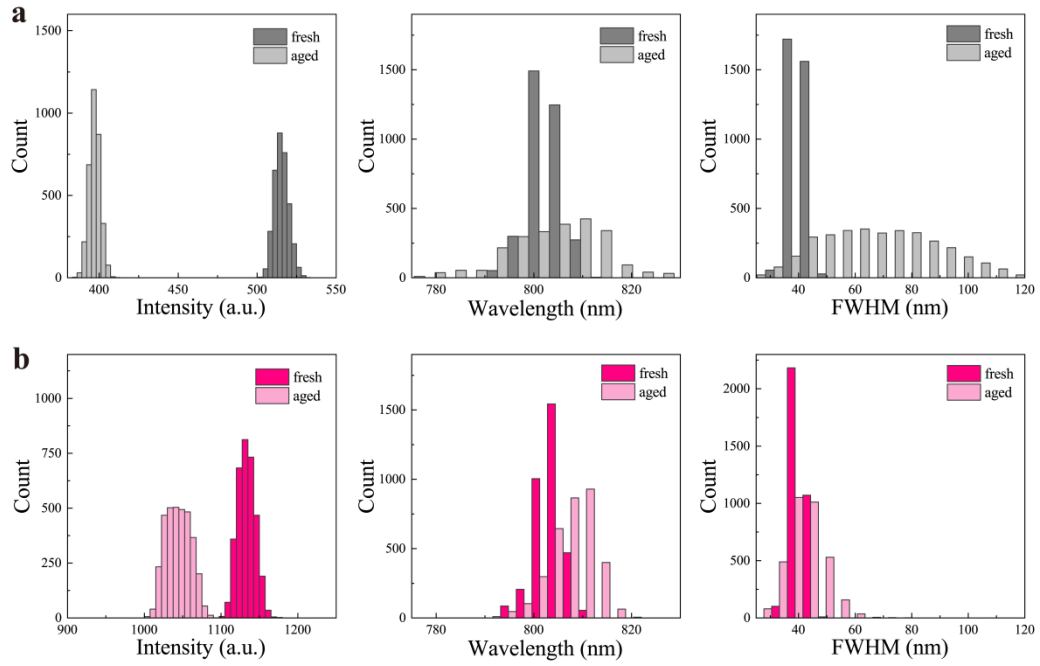

587

588 **Figure S47.** The corresponding statistics diagrams of PL mapping evolution of  
 589 perovskite films, (a) without and (b) with A18C6.

590 **Table S1.** Summary on crown ether-modified PSCs.

| Crown ether | $V_{oc}$ (V) | $J_{sc}$ (mA cm <sup>-2</sup> ) | FF (%) | PCE (%) | Operational stability              | Reference        |
|-------------|--------------|---------------------------------|--------|---------|------------------------------------|------------------|
| 12C4        | 1.14         | 24.97                           | 81.53  | 23.24   |                                    | 32               |
| 12C4        | 1.144        | 23.58                           | 78     | 21.04   |                                    | 33               |
| 15C5        | 1.16         | 24.15                           | 76.6   | 21.5    |                                    | 34               |
| B15C5       | 1.14         | 21.1                            | 74.5   | 18.1    |                                    | 35               |
| 18C6        | 1.06         | 24.40                           | 79.19  | 20.48   | $T_{90} = \sim 50$ h <sup>a)</sup> | 36               |
| 18C6        | 1.17         | 23.63                           | 74.8   | 20.71   |                                    | 37               |
| 18C6        | 1.17         | 23.62                           | 74.8   | 20.71   |                                    | 38               |
| 18C6        | 0.96         | 22.4                            | 68     | 14.7    |                                    | 39               |
| DB24C8      | 1.154        | 25.80                           | 79.5   | 23.7    | $T_{80} = 300$ h <sup>b)</sup>     | 40               |
| DB21C7      | 1.17         | 25.50                           | 81.9   | 24.3    | $T_{95} = 500$ h <sup>b)</sup>     | 41               |
| DB18C6      | 1.11         | 23.84                           | 78.75  | 20.84   | $T_{95} = 500$ h <sup>c)</sup>     | 42               |
| A18C6       | 1.169        | 26.29                           | 83.30  | 25.60   | $T_{95} = 1200$ h <sup>b)</sup>    | <b>this work</b> |

591

592 a) under continuous illumination, encapsulated solar module under maximum power point  
593 (MPP) measurement at RH 45±5%594 b) unencapsulated devices under maximum power point tracking, AM 1.5 G, 100 mW/cm<sup>2</sup> in  
595 N<sub>2</sub>, room temperature.596 c) unencapsulated devices with AM 1.5 G irradiation at room temperature in N<sub>2</sub>.

597 **Table S2.** The parameters of different quantum chemical properties of crown ethers.

|        | Dipole<br>moment (D) | E <sub>HOMO</sub><br>(eV) | E <sub>LUMO</sub><br>(eV) | Gap<br>(eV) | $\eta$ (eV) | $\mu$ (eV) |
|--------|----------------------|---------------------------|---------------------------|-------------|-------------|------------|
| 18C6   | 0.0061               | -6.600                    | 0.695                     | 7.296       | 3.648       | -2.953     |
| A18C6  | 0.529                | -5.894                    | 1.007                     | 6.901       | 3.451       | -2.443     |
| DA18C6 | 0.001                | -6.005                    | 0.975                     | 6.980       | 3.490       | -2.515     |
| 15C5   | 1.7188               | -6.721                    | 1.044                     | 7.765       | 3.883       | -2.839     |
| A15C5  | 3.543                | -6.239                    | 0.771                     | 7.010       | 3.505       | -2.734     |
| DA15C5 | 0.7831               | -5.997                    | 1.003                     | 7.001       | 3.500       | -2.497     |

598

599 Notes:

600 The energy values of HOMO and LUMO were calculated from density functional  
 601 theory analysis. Gap, chemical hardness ( $\eta$ ) and chemical potential ( $\mu$ ) were derived  
 602 according to the following formula:  $\text{Gap} = E_{\text{LUMO}} - E_{\text{HOMO}}$ ,  $\eta = (E_{\text{LUMO}} - E_{\text{HOMO}})/2$ ,  
 603  $\mu = (E_{\text{LUMO}} + E_{\text{HOMO}})/2$ <sup>43,44</sup>.

604 **Table S3.** The calculation of average distances in **Figure S7**.

| Distance (Å) | Pb-O  | Pb-N  | Pb-C  | Pb-all |
|--------------|-------|-------|-------|--------|
| A18C6        | 3.585 | 3.672 | 4.082 | 3.921  |
| DA18C6       | 3.372 | 3.274 | 4.052 | 3.814  |
| A15C5        | 3.778 | 4.128 | 3.899 | 3.882  |
| DA15C5       | 3.192 | 3.434 | 3.888 | 3.688  |

605 Notes:

606 The distance of Pb-all in the last column is calculated by the distances between Pb atom  
607 and C, N and O atoms (i.e., the distances between Pb and all the atoms in ACE except  
608 H atoms).



609 **Table S4.** The calculation of Pb-CE plane distances in **Figure S6** side view.

610

|        | Distance of [Pb-CE plane] (Å) |
|--------|-------------------------------|
| 18C6   | 2.6                           |
| A18C6  | 3.8                           |
| DA18C6 | 2.7                           |
| 15C5   | 4.9                           |
| A15C5  | 7.1                           |
| DA15C5 | 5.3                           |

611

612 **Table S5.** Preparation of DMF solutions for ultraviolet-visible titration

| solution | solute                      |                   |
|----------|-----------------------------|-------------------|
| ①        | 0.2 mmol/L PbI <sub>2</sub> |                   |
| ②        | 0.2 mmol/L PbI <sub>2</sub> | 0.2 mmol/L A18C6  |
| ③        | 0.2 mmol/L PbI <sub>2</sub> | 0.2 mmol/L DA18C6 |
| ④        | 0.2 mmol/L PbI <sub>2</sub> | 0.2 mmol/L A15C5  |
| ⑤        | 0.2 mmol/L PbI <sub>2</sub> | 0.2 mmol/L DA15C5 |
| ⑥        | 0.2 mmol/L PbI <sub>2</sub> | 0.2 mmol/L 18C6   |
| ⑦        | 1.5 mol/L FAI               |                   |
| ⑧        | 0.2 mmol/L PbI <sub>2</sub> | 0.15 mol/L FAI    |
| ⑨        | 2 mmol/L A18C6              |                   |

613

614 **Table S6.** Benesi-Hildebrand analysis of the UV-vis data. The unit of  $K_f$  is  $(\text{mol/L})^{-1}$ .

|        | intercept | $K_f$ |
|--------|-----------|-------|
| W/O    | 1.97      | 94    |
| A18C6  | 0.87      | 7     |
| DA18C6 | 1.34      | 22    |
| A15C5  | 1.65      | 44    |
| DA15C5 | 1.65      | 44    |
| 18C6   | 1.51      | 32    |

615

616 **Table S7.** Summary on solution aging and stabilization methods.

| Aging conditions      | Method                                         | Step | Mechanism                                                                                                                    | Reference                                         |
|-----------------------|------------------------------------------------|------|------------------------------------------------------------------------------------------------------------------------------|---------------------------------------------------|
| /                     | hypophosphorous acid                           | D    | reduce the oxidized I <sub>2</sub> back into I <sup>-</sup>                                                                  | Nat. Commun. 2015, 6, 10030                       |
| RT for 12 hours       | methylamine                                    | D    | eliminate the remnant I <sub>2</sub> in the oxidized precursors by disproportionation                                        | Adv. Mater. 2017, 29, 1606774                     |
| RT for 39 days        | ITIC-Th                                        | E    | stabilize the [PbI <sub>6</sub> ] <sup>+</sup> framework and suppress the yellow non-perovskite phase                        | Adv. Energy Mater. 2018, 8, 1703399               |
| RT for 5 days         | tri-iodide ions                                | D    | compensates the loss of I <sup>-</sup> ions due to the photo-oxidation, suppress the aggregation of colloids particles       | Electrochimica Acta 2019, 311, 132-140            |
| 60 °C for 8 days      | elemental sulfur                               | A    | prevent the deprotonation of MAI to volatile methylamine and prevent the generation of δ-FAPbI <sub>3</sub>                  | Adv. Energy Mater. 2019, 9, 1803476               |
| RT for 230 days       | KI+KI <sub>3</sub>                             | A    | form MAI <sub>3</sub> complex and maintain the amount of MA cations in precursor solution                                    | Nano Energy 2019, 63, 103853                      |
| 60 °C for 1 day       | triethyl borate                                | A    | restrain the deprotonation of MAI                                                                                            | Chem 2020, 6, 1369-1378                           |
| RT for 30 days        | 18C6                                           | E    | form complex with Pb <sup>2+</sup> and suppress the formation of PbI <sub>2</sub> and δ-FAPbI <sub>3</sub>                   | Adv. Funct. Mater. 2020, 30, 1908613              |
| RT in air for 7 days  | (hexafluoroisopropylidene)diphthalic anhydride | B    | stabilize highly active Pb <sup>2+</sup> and FA <sup>+</sup> ions by donating lone pair electrons                            | ACS Energy Lett. 2021, 6, 3425-3434               |
| 4 °C for 115 days     | cold storage                                   | AB   | suppress the deprotonation of methylammonium, and the subsequent formation of MFA and DMFA                                   | ChemSusChem 2021, 14, 2537-2546                   |
| 60 °C for 7 days      | phenylboric acid                               | AB   | restrict the deprotonation of FAI and inhibit the self-condensation reaction to form s-triazine                              | Sol. RRL 2021, 5, 2000715                         |
| RT for 7 days         | CsI                                            | AB   | coordinate methylamine and suppress the formation of the new species MFA and DMFA                                            | Cell Rep. Phys. Sci. 2021, 2, 100432              |
| RT for 60 days        | benzylhydrazine hydrochloride                  | D    | reduce the detrimental I <sub>2</sub> back to I <sup>-</sup>                                                                 | Sci. Adv. 2021, 7, eabe8130                       |
| 50 °C for 5 days      | H <sub>3</sub> BO <sub>3</sub> additive        | AB   | inhibit the deprotonation of methylamine iodide and the transimine reaction of methylamine and formamidine iodide            | SCIENTIA SINICA Chimica 2022(2), 52, 355-361      |
| RT for 21 days        | perovskite microcrystals                       | AB   | protect the FA group and inhibit its adverse reaction with MA                                                                | ACS Appl. Mater. Interfaces 2022, 14, 52960-52970 |
| RT in air for 50 days | diethyl (hydroxymethyl) phosphonate            | ABD  | inhibit the reactivity of the iodide and formamidinium ions                                                                  | Adv. Energy Mater. 2022, 12, 2200650              |
| 30 °C for 60 days     | formaldehyde                                   | A    | eliminate organoamines in the precursor                                                                                      | ACS Energy Lett. 2022, 7, 481-489                 |
| RT for 75 days        | 3-hydrazinobenzoic acid                        | ABD  | suppress the oxidation of I <sup>-</sup> , inhibit the deprotonation of organic cations and subsequent amine cation reaction | Angew. Chem. Int. Ed. 2022, 61, e202206914        |
| RT for 21 days        | triethyl phosphate                             | AB   | prevent the deprotonation of MAI and inhibit the formation of MFA <sup>+</sup>                                               | Angew. Chem. Int. Ed. 2023, 62, e202215799        |
| 85 °C for 20 days     | potassium formate                              | D    | reduce I <sub>2</sub> back to I <sup>-</sup>                                                                                 | Adv. Funct. Mater. 2023, 2303225                  |

617

618 **Table S8.** Lifetimes of perovskite films obtained from TRPL spectra.

619

| 1.56 eV PVK    | $A_1$ | $t_1$ (ns) | $A_2$ | $t_2$ (ns) | $t_{ave}$ (ns) |
|----------------|-------|------------|-------|------------|----------------|
| W/O fresh      | 157.6 | 150.8      | 718.3 | 1411.0     | 1382.1         |
| W/O 120 days   | 54.9  | 31.0       | 338.5 | 119.7      | 116.1          |
| A18C6 fresh    | 68.9  | 218.0      | 848.4 | 5649.0     | 5632.0         |
| A18C6 120 days | 431.0 | 161.6      | 472.7 | 977.6      | 870.7          |

620

621 The fitting of lifetime follows the formula:  $y = A_1 \cdot \exp(-x/t_1) + A_2 \cdot \exp(-x/t_2) + y_0$

622 where  $A$  is amplitude,  $t$  is a time constant.

623 **Table S9.** Lifetimes of perovskite films obtained from TRPL spectra.

624

| 1.56 eV | $A_1$ | $t_1$ (ns) | $A_2$ | $t_2$ (ns) | $t_{ave}$ (ns) |
|---------|-------|------------|-------|------------|----------------|
| W/O     | 157.6 | 150.8      | 718.3 | 1411.0     | 1382.1         |
| A18C6   | 68.9  | 218.0      | 848.4 | 5649.0     | 5632.0         |
| DA18C6  | 82.7  | 141.0      | 859.2 | 4989.9     | 4976.7         |
| A15C5   | 93.3  | 352.4      | 834.8 | 3411.6     | 3376.7         |
| DA15C5  | 236.7 | 460.7      | 638.1 | 3465.3     | 3324.1         |

625

626 **Table S10.** Parameters of dark  $J$ - $V$  curves of perovskite films.

627 The defect densities ( $N_t$ ) are determined according to the equation:

628 
$$N_t = 2V_{\text{TFL}} \epsilon_r \epsilon_0 / (ed^2) \quad (\text{Equation 17})$$

629 where  $\epsilon_0$  is the vacuum permittivity,  $\epsilon_r$  is the relative dielectric constant,  $V_{\text{TFL}}$  represents  
630 the trap-filled limit voltage,  $e$  is the elementary charge, and  $d$  is the perovskite film  
631 thickness, respectively. ( $\epsilon_0=8.854 \times 10^{-12}$  F/m  $\epsilon_r=47$   $e=1.602 \times 10^{-19}$  C  $d=700$  nm)

632

|          |                                         | W/O  | A18C6 | DA18C6 | A15C5 | DA15C5 |
|----------|-----------------------------------------|------|-------|--------|-------|--------|
| electron | $V_{\text{TFL}}$ (V)                    | 0.93 | 0.61  | 0.62   | 0.81  | 0.82   |
|          | defect density ( $10^{15}$ cm $^{-3}$ ) | 9.9  | 6.5   | 6.6    | 8.6   | 8.7    |
| hole     | $V_{\text{TFL}}$ (V)                    | 0.89 | 0.6   | 0.58   | 0.67  | 0.73   |
|          | defect density ( $10^{15}$ cm $^{-3}$ ) | 9.4  | 6.4   | 6.1    | 7.1   | 7.7    |

633

634 **Table S11.** Average photovoltaic parameters of PSCs without and with ACEs under  
635 reverse scan.

|        | $V_{oc}$ (V) | $J_{sc}$ (mA cm <sup>-2</sup> ) | FF (%)   | PCE (%)  |
|--------|--------------|---------------------------------|----------|----------|
| W/O    | 1.07±0.01    | 24.8±0.2                        | 78.5±1.4 | 20.6±0.6 |
| A18C6  | 1.17±0.01    | 24.7±0.3                        | 81.6±0.6 | 23.5±0.5 |
| DA18C6 | 1.15±0.01    | 24.9±0.4                        | 80.7±0.7 | 23.2±0.6 |
| A15C5  | 1.09±0.01    | 25.1±0.2                        | 80.7±0.5 | 22.0±0.5 |
| DA15C5 | 1.08±0.02    | 24.6±0.2                        | 80.7±1.0 | 21.6±0.3 |

636



637 **References**

- 638 1 M. I. Saidaminov, A. L. Abdelhady, G. Maculan and O. M. Bakr, *Chemical*  
639 *communications*, 2015, **51**, 17658–17661.
- 640 2 M. I. Saidaminov, A. L. Abdelhady, B. Murali, E. Alarousu, V. M. Burlakov, W.  
641 Peng, I. Dursun, L. Wang, Y. He and G. Maculan, *Nature communications*,  
642 2015, **6**, 7586.
- 643 3 N. J. Jeon, H. Na, E. H. Jung, T.-Y. Yang, Y. G. Lee, G. Kim, H.-W. Shin, S. Il  
644 Seok, J. Lee and J. Seo, *Nature Energy*, 2018, **3**, 682–689.
- 645 4 J. Xu, C. C. Boyd, Z. J. Yu, A. F. Palmstrom, D. J. Witter, B. W. Larson, R. M.  
646 France, J. Werner, S. P. Harvey and E. J. Wolf, *Science*, 2020, **367**, 1097–1104.
- 647 5 Y. Zhang, S. Seo, S. Y. Lim, Y. Kim, S.-G. Kim, D.-K. Lee, S.-H. Lee, H. Shin,  
648 H. Cheong and N.-G. Park, *ACS Energy Letters*, 2019, **5**, 360–366.
- 649 6 T. Lu and F. Chen, *Journal of computational chemistry*, 2012, **33**, 580–592.
- 650 7 G. Kresse and J. Furthmüller, *Physical review B*, 1996, **54**, 11169.
- 651 8 J. P. Perdew, K. Burke and M. Ernzerhof, *Physical review letters*, 1996, **77**,  
652 3865.
- 653 9 D. A. Egger and L. Kronik, *The journal of physical chemistry letters*, 2014, **5**,  
654 2728–2733.
- 655 10 S. Grimme, S. Ehrlich and L. Goerigk, *Journal of computational chemistry*,  
656 2011, **32**, 1456–1465.
- 657 11 V. Wang, N. Xu, J.-C. Liu, G. Tang and W.-T. Geng, *Computer Physics*  
658 *Communications*, 2021, **267**, 108033.
- 659 12 D. J. Cram and J. M. Cram, *Science*, 1974, **183**, 803–809.
- 660 13 H.-R. Yu, J.-Q. Hu, X.-H. Lu, X.-J. Ju, Z. Liu, R. Xie, W. Wang and L.-Y. Chu,  
661 *The Journal of Physical Chemistry B*, 2015, **119**, 1696–1705.
- 662 14 Y. Zhang, Z. Xing, B. Fan, Z. Ni, F. Wang, X. Hu and Y. Chen, *Angewandte*  
663 *Chemie*, 2023, **135**, e202215799.
- 664 15 J. Kim, B. Park, J. Baek, J. S. Yun, H.-W. Kwon, J. Seidel, H. Min, S. Coelho, S.  
665 Lim and S. Huang, *Journal of the American Chemical Society*, 2020, **142**, 6251–  
666 6260.
- 667 16 D. P. McMeekin, Z. Wang, W. Rehman, F. Pulvirenti, J. B. Patel, N. K. Noel, M.  
668 B. Johnston, S. R. Marder, L. M. Herz and H. J. Snaith, *Advanced Materials*,  
669 2017, **29**, 1607039.
- 670 17 K. Yan, M. Long, T. Zhang, Z. Wei, H. Chen, S. Yang and J. Xu, *Journal of the*  
671 *American Chemical Society*, 2015, **137**, 4460–4468.
- 672 18 J. C. Hamill Jr, J. Schwartz and Y.-L. Loo, *ACS Energy Letters*, 2017, **3**, 92–97.
- 673 19 B. Li, Q. Dai, S. Yun and J. Tian, *Journal of Materials Chemistry A*, 2021, **9**,  
674 6732–6748.
- 675 20 M. Shamsipur and H. R. Pouretedal, *Journal of solution chemistry*, 1999, **28**,  
676 1187–1205.
- 677 21 G. S. Shin, Y. Zhang and N.-G. Park, *ACS applied materials & interfaces*, 2020,  
678 **12**, 15167–15174.
- 679 22 C. Chen, Y. Rao, Z. Li, X. Wang, G. Cui, W. Wang and S. Pang, *Solar RRL*,  
680 2021, **5**, 2000715.

- 681 23 M. Li, H. Li, Q. Zhuang, D. He, B. Liu, C. Chen, B. Zhang, T. Pauporté, Z. Zang  
682 and J. Chen, *Angewandte Chemie International Edition*, 2022, **61**, e202206914.
- 683 24 N. K. Noel, M. Congiu, A. J. Ramadan, S. Fearn, D. P. McMeekin, J. B. Patel,  
684 M. B. Johnston, B. Wenger and H. J. Snaith, *Joule*, 2017, **1**, 328–343.
- 685 25 S. Wang, Y. Jiang, E. J. Juarez-Perez, L. K. Ono and Y. Qi, *Nature Energy*,  
686 2016, **2**, 1–8.
- 687 26 V. Valenzano, A. Cesari, F. Balzano, A. Milella, F. Fracassi, A. Listorti, G.  
688 Gigli, A. Rizzo, G. Uccello-Barretta and S. Colella, *Cell Reports Physical*  
689 *Science*.
- 690 27 J. Liang, X. Hu, C. Wang, C. Liang, C. Chen, M. Xiao, J. Li, C. Tao, G. Xing  
691 and R. Yu, *Joule*, 2022, **6**, 816–833.
- 692 28 M.-H. Li, J.-Y. Shao, Y. Jiang, F.-Z. Qiu, S. Wang, J. Zhang, G. Han, J. Tang, F.  
693 Wang and Z. Wei, *Angewandte Chemie*, 2021, **133**, 16524–16529.
- 694 29 S.-C. Liu, Z. Li, Y. Yang, X. Wang, Y.-X. Chen, D.-J. Xue and J.-S. Hu, *Journal*  
695 *of the American Chemical Society*, 2019, **141**, 18075–18082.
- 696 30 M. I. Saidaminov, A. L. Abdelhady, G. Maculan and O. M. Bakr, *Chemical*  
697 *communications*, 2015, **51**, 17658–17661.
- 698 31 Y. Jiang, S.-C. Yang, Q. Jeangros, S. Pisoni, T. Moser, S. Buecheler, A. N.  
699 Tiwari and F. Fu, *Joule*, 2020, **4**, 1087–1103.
- 700 32 Y. Shen, K. Deng, Q. Chen, G. Gao and L. Li, *Advanced Materials*, 2022, **34**,  
701 2200978.
- 702 33 Z. Wan, H. Lu, J. Yang, Y. Zhang, F. Lin, J. Xia, X. Yao, J. Luo and C. Jia,  
703 *Journal of Energy Chemistry*, 2022, **74**, 489–496.
- 704 34 P. Gao, Y. Ji, J. Song, G. Zhou, J. Lai, X. Yin, Y. Li, T. Song, Z. Zhao, Q. Chen,  
705 W. Feng, L. Chen, Y. Zhang, S. Yang, B. Sun and F. Liu, *Cell Reports Physical*  
706 *Science*, 2021, **2**, 100450.
- 707 35 S. Ju Kim, R. Kumar Chitumalla, J.-M. Kim, J. Jang, J.-W. Oh, J. V. Milić and  
708 J.-Y. Seo, *Helvetica Chimica Acta*, 2023, **106**, e202200193.
- 709 36 R. Chen, Y. Wu, Y. Wang, R. Xu, R. He, Y. Fan, X. Huang, J. Yin, B. Wu and J.  
710 Li, *Advanced Functional Materials*, 2021, **31**, 2008760.
- 711 37 X. Wu, Y. Jiang, C. Chen, J. Guo, X. Kong, Y. Feng, S. Wu, X. Gao, X. Lu and  
712 Q. Wang, *Advanced Functional Materials*, 2020, **30**, 1908613.
- 713 38 X. Kong, Y. Jiang, Z. Li, Y. Zhou, Z. Xu, C. Cong, X. Gao, X. Lu, G. Zhou and  
714 J.-M. Liu, *Solar RRL*, 2021, **5**, 2000646.
- 715 39 K.-W. Huang, M.-H. Li, P.-T. Hsieh, C.-F. Lin, R. Rajendran, Y.-L. Tung and P.  
716 Chen, *J. Mater. Chem. C*, 2022, **10**, 16016–16027.
- 717 40 T.-S. Su, F. T. Eickemeyer, M. A. Hope, F. Jahanbakhshi, M. Mladenovic, J. Li,  
718 Z. Zhou, A. Mishra, J.-H. Yum and D. Ren, *Journal of the American Chemical*  
719 *Society*, 2020, **142**, 19980–19991.
- 720 41 H. Zhang, F. T. Eickemeyer, Z. Zhou, M. Mladenović, F. Jahanbakhshi, L.  
721 Merten, A. Hinderhofer, M. A. Hope, O. Ouellette and A. Mishra, *Nature*  
722 *Communications*, 2021, **12**, 3383.
- 723 42 X. Sun, F. Deng, S. Li, Y. Li, X. Lv, Y.-Z. Zheng and X. Tao, *Solar RRL*, 2022,  
724 **6**, 2200303.

- 725 43 P. W. Ayers, R. G. Parr and R. G. Pearson, *The Journal of chemical physics*.  
726 44 M. A. Hossain, J. Jewaratnam, A. Ramalingam, J. N. Sahu and P. Ganesan, *Fuel*,  
727 2018, **212**, 49–60.  
728  
729
